# Supplementary material for: 60,000 years of interactions between Central and Eastern Africa documented by major African mitochondrial haplogroup L2
Source: PubMed Central journal article supplement (PMC4515592; doi:10.1038/srep12526), 2015-07-27
Supplement: srep12526-s1.pdf [file srep12526-s1.pdf]

**60,000 years of interactions between Central and Eastern Africa documented by  
major African mitochondrial haplogroup L2**

**Marina Silva, Farida Alshamali, Paula Silva, Carla Carrilho, Flávio Mandlate, Maria Jesus  
Trovoada, Viktor Černý, Luísa Pereira, Pedro Soares**

**Supplementary Fig. 1. Comparison between ML and Bayesian age estimates.** Correlation between ML and Bayesian branch lengths, in nucleotides **(a)**. Variations in the ratio between ML and Bayesian node age estimates compared to the ML age of the branches, in years **(b)**.

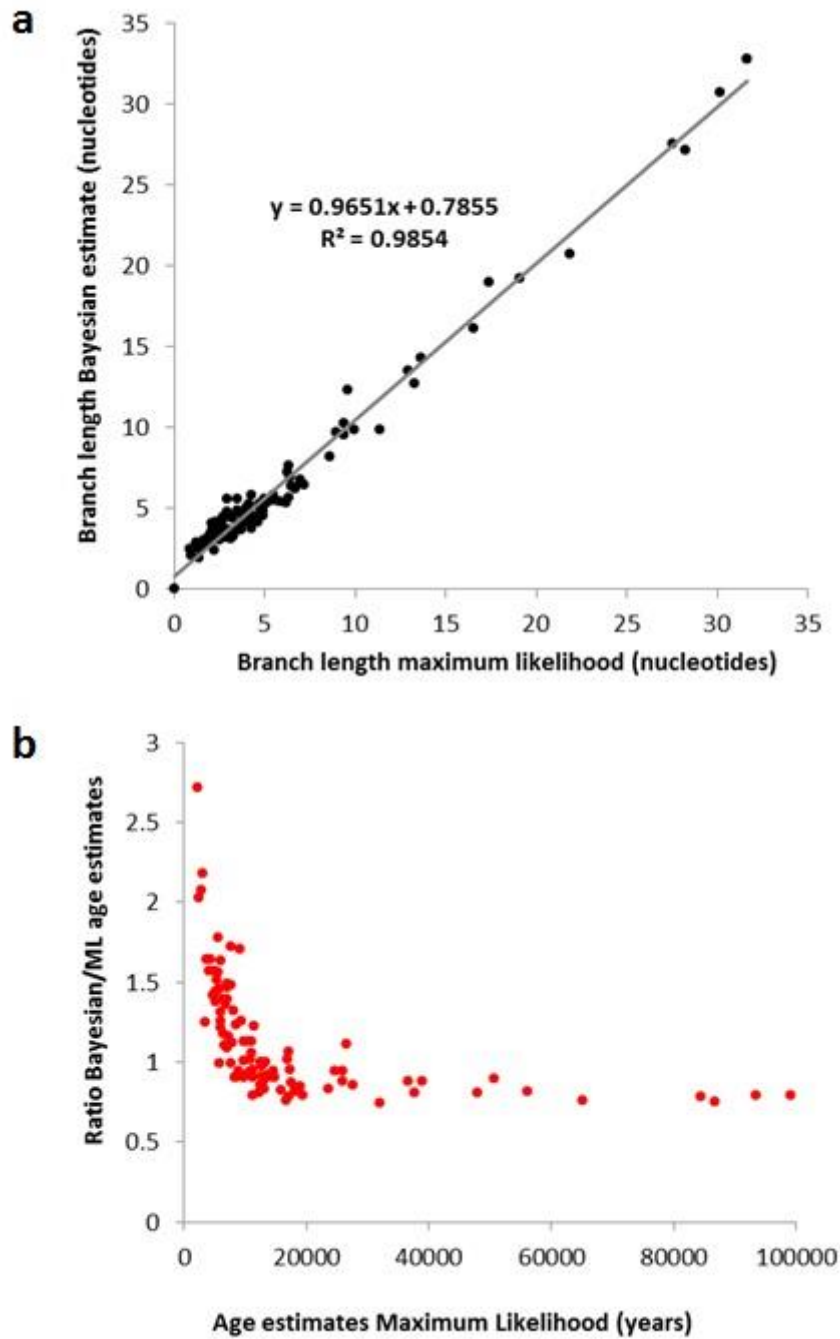

**Supplementary Fig. 2. BSPs indicating the median of the  $N_e$  associated to haplogroup L2 through time. BSP based on all L2 complete sequences from sub-Saharan Africa (a), with a maximum time (~78 ka) corresponding to the mean posterior estimate of the genealogy root-height. BSPs for different African regions: Western/Central Africa (b), Eastern Africa/Near East/Arabia Peninsula (c) and Southern Africa (d).**

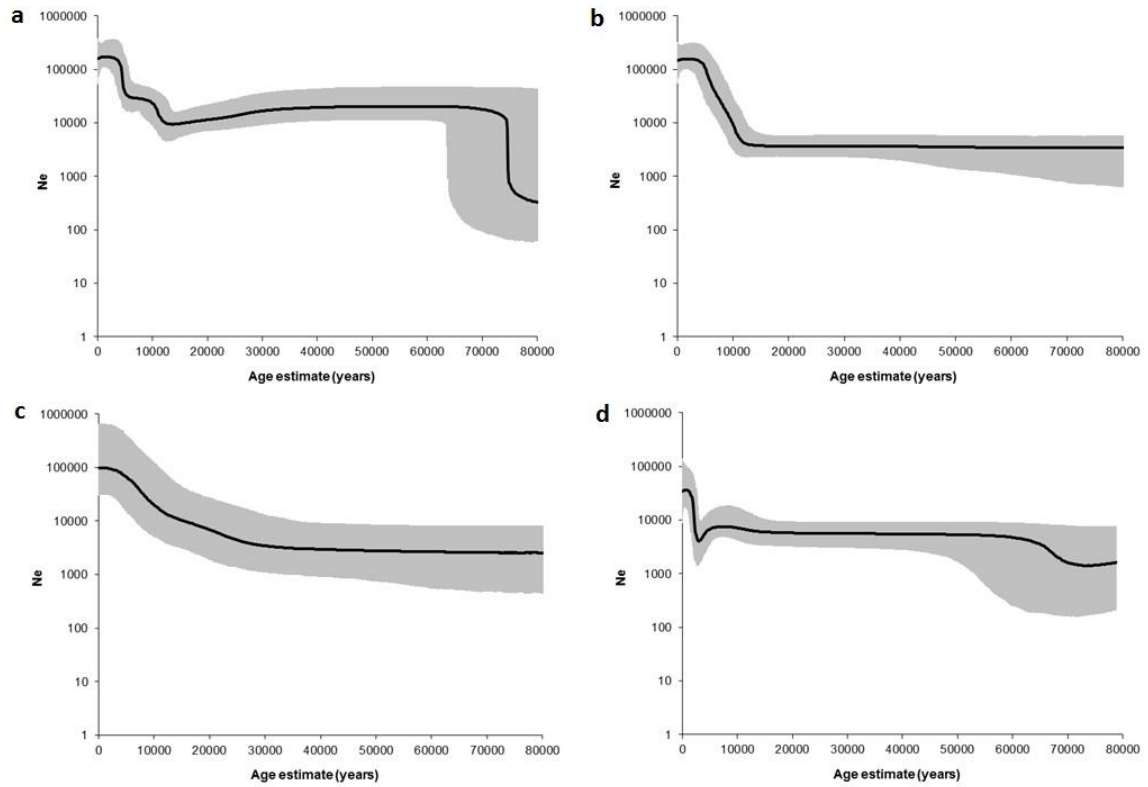

Supplementary Fig. 3. Graphs of population increments for Western/Central Africa (WA/CA), Eastern Africa/Near East/ Arabian Peninsula (EA/Arabia) and Southern Africa

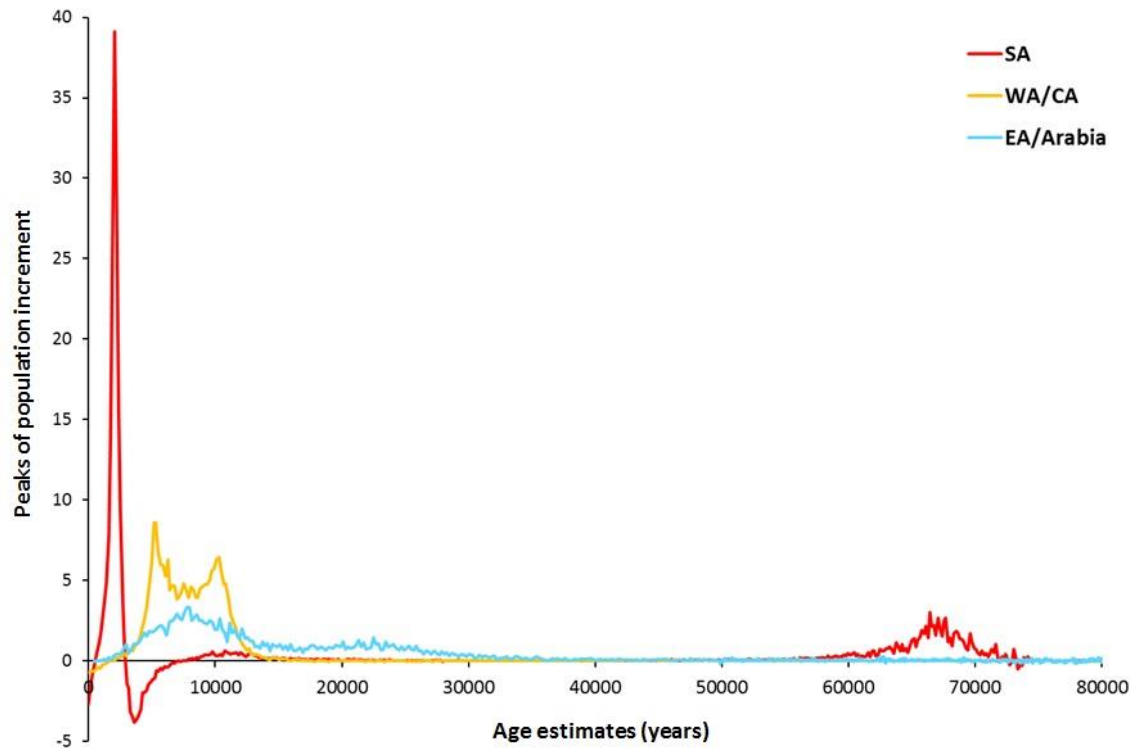

**Supplementary Fig. 4. MDS plot based on Sitkin's linearized  $F_{ST}$ , excluding L2a and L0a sequences.** Colour code: WA – Western Africa, CA – Central Africa, EA – Eastern Africa, SA – Southern Africa.

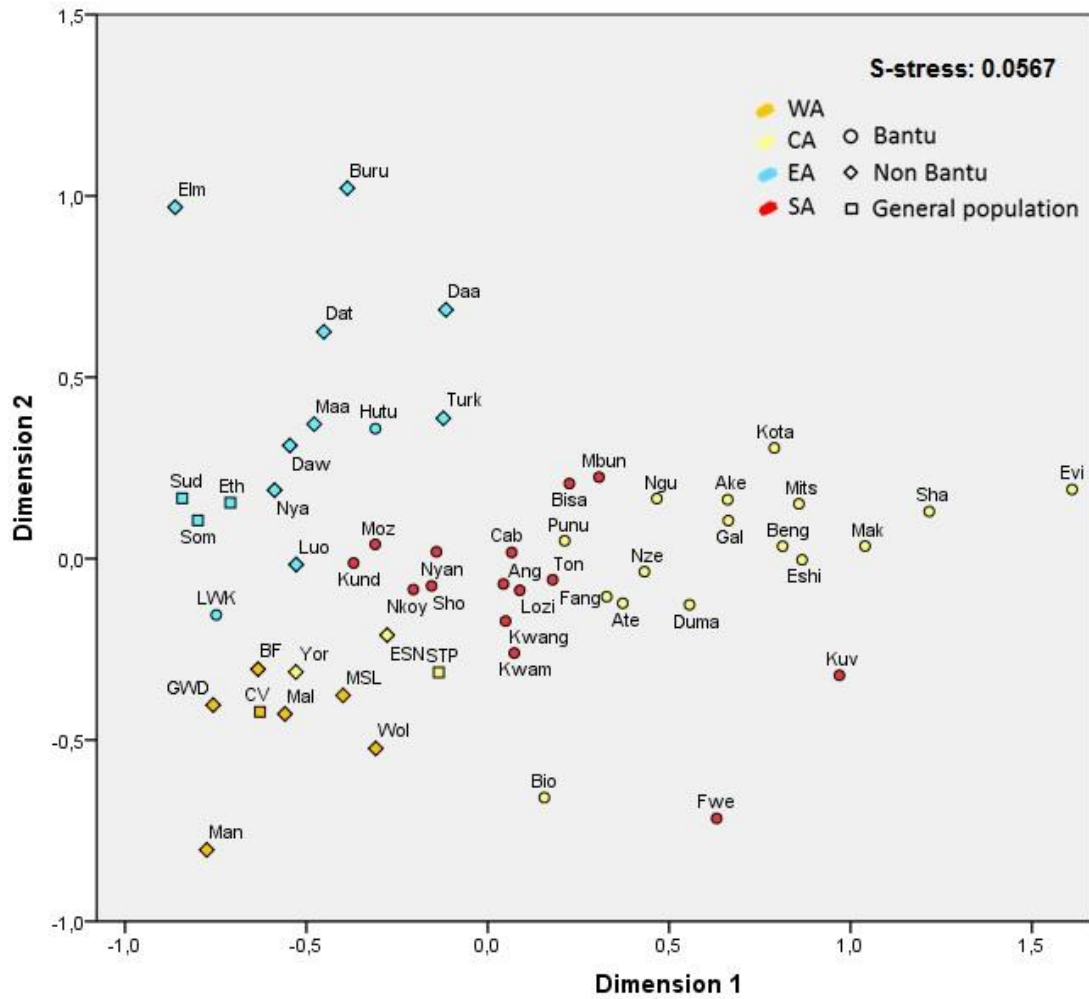

**Supplementary Fig. 5. Haplogroup composition of sub-Saharan African regions (WA – Western Africa, CA – Central Africa, EA – Eastern Africa, SA – Southern Africa), compared to Sudan, Luhya (LWK), Kunda, Shona and Nyaneka. The map was obtained from the website [www.outline-world-map.com](http://www.outline-world-map.com).**

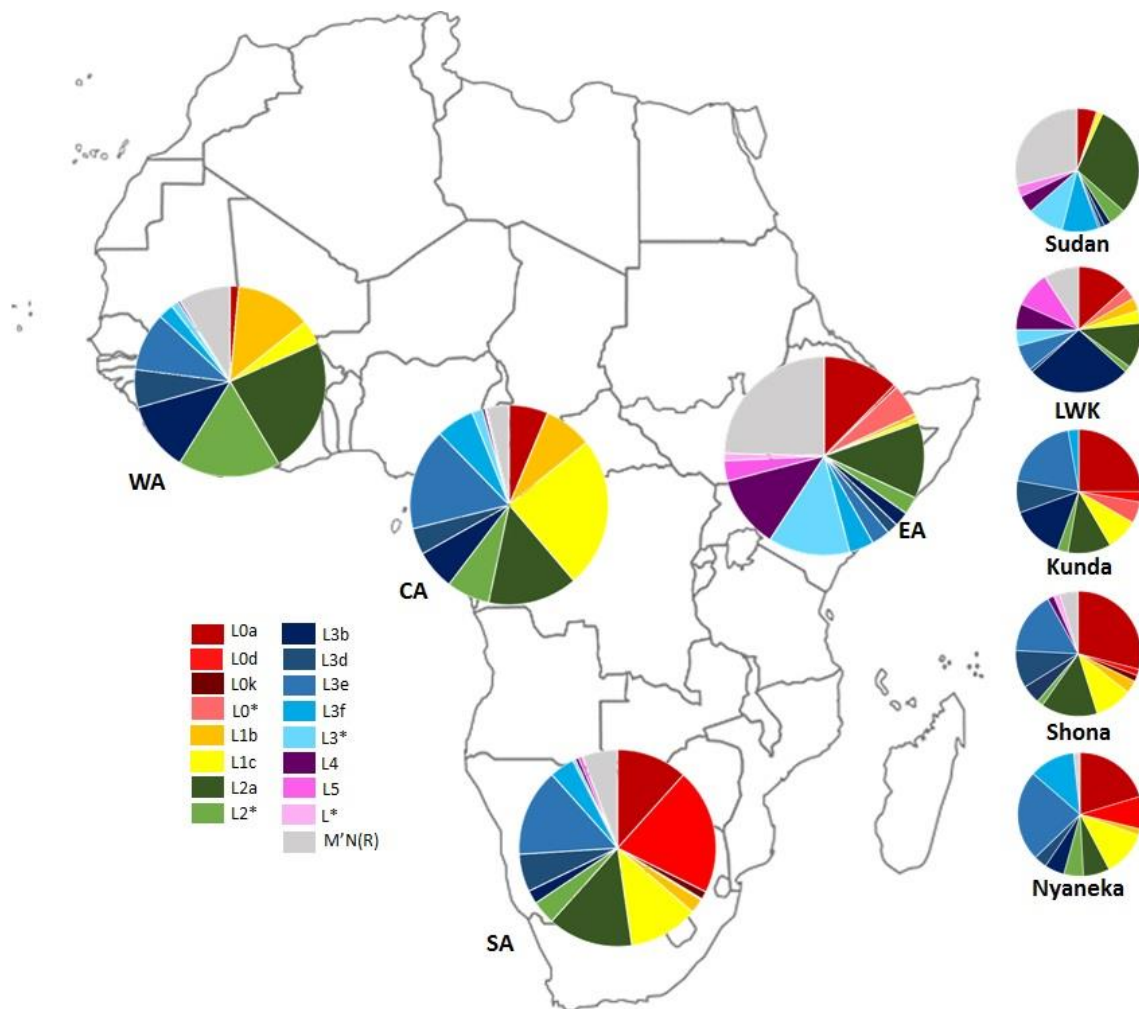

**Excel file:**

**Supplementary Table 1. Phylogenetic tree of mtDNA haplogroup L2.** Most parsimonious phylogeny of mtDNA haplogroup L2, based on a total of 801 L2 complete mitogenomes. Polymorphic positions annotated along the branches (mutations in relation to an ancestral state): uppercase for transitions and lowercase for transversions, back mutations indicated with an exclamation mark (double back mutations indicated with two exclamation marks), insertions and deletions indicated by a dot and the letter "d", respectively (shaded in grey; not considered for age estimations). New branch labels in red and shaded in yellow, braches with major alterations in comparison to PhyloTree Build 16 in rose. More detailed information on the samples and/or references on Supplementary Table 3.

**Supplementary Table 2. Phylogenetic tree of mtDNA haplogroup L0a.** Most parsimonious phylogeny of mtDNA haplogroup L0a, based on a total of 303 L0a complete mitogenomes. Polymorphic positions annotated along the branches (mutations in relation to an ancestral state): uppercase for transitions and lowercase for transversions, back mutations indicated with an exclamation mark (double back mutations indicated with two exclamation marks), insertions and deletions indicated by a dot and the letter "d", respectively (shaded in grey; not considered for age estimations). More detailed information on the samples and /or references on Supplementary Table 4.

**Supplementary Table 3. List of 801 complete L2 sequences used for phylogenetic reconstruction and phylogeography analysis.** Codes for regions: AM – America, CA – Central Africa, EA – Eastern Africa, NA – Northern Africa, NE/AP – Near East/Arabian Peninsula, SA – Southern Africa, WA – Western Africa, EUR – Europe. Abbreviations: G. Bissau – Guinea-Bissau, S. Africa – South Africa, STP – São Tomé and Príncipe, S. Arabia – Saudi Arabia, USA – United States of America. Additional information on ethnicity or geographical location indicated whenever provided by the authors. Branches labelled in this study are underlined.

| Sample    | Haplogroup           | Region  | Country / Ethnic group | Additional information | Reference     |
|-----------|----------------------|---------|------------------------|------------------------|---------------|
| ETH31     | L2a1+143             | EA      | Ethiopia               | -                      | Present study |
| EU092671  | L2a1+143+16189       | NA      | Morocco                | Jew                    | 1             |
| HG03121   | L2a1+143+16189       | CA      | Nigeria                | Esan                   | 2             |
| JQ044837  | L2a1+143+16189       | WA      | Burkina Faso           | -                      | 3             |
| SUD43     | L2a1+143+16189       | EA      | Sudan                  | -                      | Present study |
| SUD12     | L2a1+143+16189       | EA      | Sudan                  | -                      | Present study |
| ETH5      | L2a1+143+16189       | EA      | Ethiopia               | -                      | Present study |
| SOM76     | L2a1+143+16189       | EA      | Somalia                | -                      | Present study |
| EU092679  | L2a1+143+16189+16192 | AP / NE | Israel                 | Palestinian            | 1             |
| EU092782  | L2a1+143+16189+16192 | AP / NE | Oman                   | -                      | 1             |
| EU092793  | L2a1+143+16189+16192 | AP / NE | Yemen                  | -                      | 1             |
| JQ702430  | L2a1+143+16189+16192 | AM      | USA                    | -                      | 1             |
| EU092806  | L2a1+143+16189+16192 | NA      | Morocco                | -                      | 1             |
| Howell434 | L2a1+143+16189+16192 | AM      | USA                    | -                      | 4             |
| EU092659  | L2a1+143+16189+16192 | AP / NE | Israel                 | Druze                  | 1             |
| FJ460527  | L2a1+143+16189+16192 | NA      | Tunisia                | -                      | 5             |
| EU092674  | L2a1+143+16189+16192 | EA      | Ethiopia               | Jew                    | 1             |
| HG03342   | L2a1+143+16189+16192 | CA      | Nigeria                | Esan                   | 2             |
| ETH23     | L2a1+143+16189+16192 | EA      | Ethiopia               | -                      | Present study |
| EU092823  | L2a1+143+16189+16192 | NA      | Libya                  | -                      | 1             |
| EU092658  | L2a1+143+16189+16192 | AP / NE | Israel                 | Bedouin                | 1             |
| EU597491  | L2a1+143+16189+16192 | AP / NE | Israel                 | Bedouin                | 6             |
| FJ460520  | L2a1+143+16189+16309 | NA      | Tunisia                | -                      | 5             |
| JQ044822  | L2a1+143+16189+16309 | WA      | Burkina Faso           | -                      | 3             |
| JQ044839  | L2a1+143+16189+16309 | WA      | Burkina Faso           | -                      | 3             |
| HG03485   | L2a1+143+16189+16309 | WA      | Sierra Leone           | Mende                  | 2             |
| JQ045062  | L2a1+16189           | WA      | Burkina Faso           | -                      | 3             |
| HG03028   | L2a1+16189           | WA      | Gambia                 | -                      | 2             |
| Howell195 | L2a1a                | AM      | USA                    | -                      | 4             |
| Howell382 | L2a1a                | AM      | USA                    | -                      | 4             |
| Howell577 | L2a1a                | AM      | USA                    | -                      | 4             |
| EU092916  | L2a1a                | EA      | Kenya                  | -                      | 4             |
| DQ304926  | L2a1a                | AM      | USA                    | -                      | 7             |
| JQ044922  | L2a1a                | WA      | Burkina Faso           | -                      | 3             |
| DQ304927  | L2a1a                | AM      | USA                    | -                      | 7             |
| HG03114   | L2a1a                | CA      | Nigeria                | Esan                   | 2             |
| DQ304928  | L2a1a                | AM      | USA                    | -                      | 7             |
| HG02588   | L2a1a                | WA      | Gambia                 | -                      | 2             |
| DQ304924  | L2a1a                | AM      | USA                    | -                      | 7             |



**Supplementary Table 3.** (continued)

|           |        |    |              |                   |               |
|-----------|--------|----|--------------|-------------------|---------------|
| DQ304932  | L2a1a  | AM | USA          | -                 | 7             |
| HG02501   | L2a1a  | AM | Barbados     | African Caribbean | 2             |
| JQ044942  | L2a1a  | WA | Burkina Faso | -                 | 3             |
| JQ044885  | L2a1a  | WA | Burkina Faso | -                 | 3             |
| JQ044961  | L2a1a  | WA | Burkina Faso | -                 | 3             |
| SUD56     | L2a1a  | EA | Sudan        | -                 | Present study |
| HG02852   | L2a1a  | WA | Gambia       | -                 | 2             |
| HG02860   | L2a1a  | WA | Gambia       | -                 | 2             |
| JQ044927  | L2a1a  | WA | Burkina Faso | -                 | 3             |
| JQ044983  | L2a1a  | WA | Burkina Faso | -                 | 3             |
| JQ044992  | L2a1a  | WA | Burkina Faso | -                 | 3             |
| JQ705087  | L2a1a  | -  | unknown      | -                 | 8             |
| JQ044911  | L2a1a  | WA | Burkina Faso | -                 | 3             |
| JQ044818  | L2a1a  | WA | Burkina Faso | -                 | 3             |
| HG03563   | L2a1a  | WA | Sierra Leone | Mende             | 2             |
| KJ185692  | L2a1a  | SA | Zambia       | Mbunda            | 9             |
| KJ185688  | L2a1a  | SA | Zambia       | Mbunda            | 9             |
| MOZ326    | L2a1a  | SA | Mozambique   | -                 | Present study |
| MOZ33     | L2a1a  | SA | Mozambique   | -                 | Present study |
| SOM68     | L2a1a  | EA | Somalia      | -                 | Present study |
| Howell162 | L2a1a1 | AM | USA          | -                 | 4             |
| Howell156 | L2a1a1 | AM | USA          | -                 | 4             |
| Howell571 | L2a1a1 | AM | USA          | -                 | 4             |
| DQ304925  | L2a1a1 | AM | USA          | -                 | 7             |
| DQ304933  | L2a1a1 | AM | USA          | -                 | 7             |
| JQ706014  | L2a1a1 | -  | unknown      | -                 | 8             |
| JQ045001  | L2a1a1 | WA | Burkina Faso | -                 | 3             |
| JQ044977  | L2a1a1 | WA | Burkina Faso | -                 | 3             |
| JQ045005  | L2a1a1 | WA | Burkina Faso | -                 | 3             |
| JQ045020  | L2a1a1 | WA | Burkina Faso | -                 | 3             |
| JQ045066  | L2a1a1 | WA | Burkina Faso | -                 | 3             |
| JQ045074  | L2a1a1 | WA | Burkina Faso | -                 | 3             |
| KJ185589  | L2a1a1 | SA | Zambia       | Lozi              | 9             |
| KJ185982  | L2a1a1 | SA | Zambia       | Lunda             | 9             |
| KJ185827  | L2a1a1 | SA | Angola       | Ovimbundu         | 9             |
| HG03460   | L2a1a1 | WA | Sierra Leone | Mende             | 2             |
| HG03578   | L2a1a1 | WA | Sierra Leone | Mende             | 2             |
| HG02922   | L2a1a1 | CA | Nigeria      | Esan              | 2             |
| HG03410   | L2a1a1 | WA | Sierra Leone | Mende             | 2             |
| HG03548   | L2a1a1 | WA | Sierra Leone | Mende             | 2             |
| HQ425645  | L2a1a2 | AM | USA          | -                 | Family Tree   |
| HG01363   | L2a1a2 | AM | Colombia     | Medellín          | 2             |
| JQ044987  | L2a1a2 | WA | Burkina Faso | -                 | 3             |
| HG03123   | L2a1a2 | CA | Nigeria      | Esan              | 2             |
| KC622072  | L2a1a2 | SA | Botswana     | Kalanga           | 10            |
| JQ044997  | L2a1a2 | WA | Burkina Faso | -                 | 3             |

**Supplementary Table 3.** (continued)

|           |           |         |              |                 |               |
|-----------|-----------|---------|--------------|-----------------|---------------|
| JQ044809  | L2a1a2    | WA      | Burkina Faso | -               | 3             |
| JQ044812  | L2a1a2    | WA      | Burkina Faso | -               | 3             |
| JQ044952  | L2a1a2    | WA      | Burkina Faso | -               | 3             |
| JQ045076  | L2a1a2    | WA      | Burkina Faso | -               | 3             |
| JQ045027  | L2a1a2    | WA      | Burkina Faso | -               | 3             |
| JQ044879  | L2a1a2    | WA      | Burkina Faso | -               | 3             |
| JQ044884  | L2a1a2    | WA      | Burkina Faso | -               | 3             |
| JQ044945  | L2a1a2    | WA      | Burkina Faso | -               | 3             |
| JQ044951  | L2a1a2    | WA      | Burkina Faso | -               | 3             |
| JQ045048  | L2a1a2    | WA      | Burkina Faso | -               | 3             |
| Howell570 | L2a1a2    | AM      | USA          | -               | 4             |
| DQ304971  | L2a1a2    | AM      | USA          | -               | 7             |
| KC622070  | L2a1a2    | SA      | Botswana     | Tswana          | 10            |
| KJ185440  | L2a1a2    | SA      | Zambia       | Luvale          | 9             |
| MOZ88     | L2a1a2    | SA      | Mozambique   | -               | Present Study |
| JN214449  | L2a1a2    | EUR     | Italy        | Umbria (Centre) | 11            |
| JN214457  | L2a1a2    | EUR     | Italy        | Marche (Centre) | 11            |
| Howell569 | L2a1a2    | AM      | USA          | -               | 4             |
| Howell380 | L2a1a2    | AM      | USA          | -               | 4             |
| DQ304977  | L2a1a2    | AM      | USA          | -               | 7             |
| DQ304968  | L2a1a2    | AM      | USA          | -               | 7             |
| AF346977  | L2a1a2    | -       | unknown      | Effik           | 12            |
| EU092691  | L2a1a2    | SA      | Mozambique   | Tswa            | 1             |
| EU092804  | L2a1a2    | AP / NE | Yemen        | -               | 1             |
| EU092933  | L2a1a2    | AS      | Pakistan     | Makrani         | 1             |
| JQ705250  | L2a1a2    | -       | unknown      | -               | 8             |
| KC622069  | L2a1a2    | SA      | Botswana     | Tswana          | 10            |
| KJ185769  | L2a1a2    | SA      | Angola       | Nyaneka         | 9             |
| JX303760  | L2a1a2    | SA      | Zambia       | -               | 13            |
| KJ185896  | L2a1a2    | SA      | Zambia       | Kwangwa         | 9             |
| KJ185768  | L2a1a2    | SA      | Angola       | Nyaneka         | 9             |
| KJ185829  | L2a1a2    | SA      | Angola       | Ovimbundu       | 9             |
| KJ185934  | L2a1a2    | SA      | Zambia       | Makoma          | 9             |
| MOZ142    | L2a1a2    | SA      | Mozambique   | -               | Present study |
| MOZ99     | L2a1a2    | SA      | Mozambique   | -               | Present study |
| SOM72     | L2a1a2    | EA      | Somalia      | -               | Present study |
| DQ304975  | L2a1a2a   | AM      | USA          | -               | 7             |
| JQ044968  | L2a1a2a1  | WA      | Burkina Faso | -               | 3             |
| JQ044845  | L2a1a2a1  | WA      | Burkina Faso | -               | 3             |
| MOZ36     | L2a1a2a1  | SA      | Mozambique   | -               | Present study |
| DQ304969  | L2a1a2a1a | AM      | USA          | -               | 7             |
| DQ304970  | L2a1a2a1a | AM      | USA          | -               | 7             |
| KJ185973  | L2a1a2a1a | SA      | Zambia       | Kaonde          | 9             |
| KJ185733  | L2a1a2a1a | SA      | Zambia       | Nkoya           | 9             |
| KJ185732  | L2a1a2a1a | SA      | Zambia       | Nkoya           | 9             |
| DQ304976  | L2a1a2a1a | AM      | USA          | -               | 7             |

**Supplementary Table 3.** (continued)

|           |           |     |              |                   |               |
|-----------|-----------|-----|--------------|-------------------|---------------|
| DQ304974  | L2a1a2a1a | AM  | USA          | -                 | 7             |
| Howell142 | L2a1a2a1a | AM  | USA          | -                 | 4             |
| EU092829  | L2a1a2a1a | NA  | Tunisia      | -                 | 1             |
| JQ045017  | L2a1a2a1a | WA  | Burkina Faso | -                 | 3             |
| JQ705055  | L2a1a2a1a | SA  | Mozambique   | -                 | 8             |
| KJ185826  | L2a1a2a1a | SA  | Angola       | Ovimbundu         | 9             |
| KJ185679  | L2a1a2a1a | SA  | Zambia       | Mbunda            | 9             |
| KJ185824  | L2a1a2a1a | SA  | Angola       | Ovimbundu         | 9             |
| MOZ317    | L2a1a2a1a | SA  | Mozambique   | -                 | Present study |
| EU092872  | L2a1a2a1a | SA  | S. Africa    | SEB               | 1             |
| KJ185997  | L2a1a2a1a | SA  | Zambia       | Ngoni             | 9             |
| Howell562 | L2a1a2a1a | AM  | USA          | -                 | 4             |
| HG02941   | L2a1a2a1a | CA  | Nigeria      | Esan              | 2             |
| EU092778  | L2a1a2a1a | NA  | Egypt        | -                 | 1             |
| KJ185455  | L2a1a2a1a | SA  | Zambia       | Lenje             | 9             |
| DQ304972  | L2a1a2b   | AM  | USA          | -                 | 7             |
| DQ304973  | L2a1a2b   | AM  | USA          | -                 | 7             |
| Howell199 | L2a1a2b   | AM  | USA          | -                 | 4             |
| HG02439   | L2a1a2b   | AM  | Barbados     | African Caribbean | 2             |
| JQ045088  | L2a1a2b   | WA  | Yoruba       | Yoruba            | 3             |
| JQ045095  | L2a1a2b   | WA  | Yoruba       | Yoruba            | 3             |
| HG02676   | L2a1a3    | WA  | Gambia       | -                 | 2             |
| HG03539   | L2a1a3    | WA  | Gambia       | -                 | 2             |
| HG02870   | L2a1a3    | WA  | Gambia       | -                 | 2             |
| JQ044892  | L2a1a3    | WA  | Burkina Faso | -                 | 3             |
| JQ045015  | L2a1a3    | WA  | Burkina Faso | -                 | 3             |
| JQ044877  | L2a1a3    | WA  | Burkina Faso | -                 | 3             |
| EU092711  | L2a1a3    | EUR | Portugal     | Portuguese        | 1             |
| EU092890  | L2a1a3a   | CA  | Chad         | Sara              | 1             |
| EU092905  | L2a1a3a   | CA  | Chad         | Sara              | 1             |
| JQ044813  | L2a1a3a   | WA  | Burkina Faso | -                 | 3             |
| JQ705529  | L2a1a3a   | -   | unknown      | -                 | 8             |
| JQ044918  | L2a1a3b   | WA  | Burkina Faso | -                 | 3             |
| JQ044819  | L2a1a3b   | WA  | Burkina Faso | -                 | 3             |
| DQ304948  | L2a1a3b   | AM  | USA          | -                 | 7             |
| HM771168  | L2a1a3c   | CA  | Pygmy        | Pygmy             | 14            |
| HG03169   | L2a1a3c   | CA  | Nigeria      | Esan              | 2             |
| KJ185771  | L2a1a3c   | SA  | Angola       | Nyaneka           | 9             |
| KC622184  | L2a1a3c   | SA  | Namibia      | Himba             | 10            |
| STP99     | L2a1a3c   | WA  | STP          | -                 | Present study |
| KJ185770  | L2a1a3c   | SA  | Angola       | Nyaneka           | 9             |
| JQ045101  | L2a1a3c   | WA  | Yoruba       | Yoruba            | 3             |
| HG02977   | L2a1a3c   | CA  | Nigeria      | Esan              | 2             |
| JQ044975  | L2a1b     | WA  | Burkina Faso | -                 | 3             |
| JQ044841  | L2a1b     | WA  | Burkina Faso | -                 | 3             |
| NA20274   | L2a1b     | AM  | USA          | -                 | 2             |

**Supplementary Table 3. (continued)**

|          |         |         |              |                   |               |
|----------|---------|---------|--------------|-------------------|---------------|
| KJ185828 | L2a1b   | SA      | Angola       | Ovimbundu         | 9             |
| EU092761 | L2a1b   | NA      | Egypt        | -                 | 1             |
| MOZ95    | L2a1b1  | SA      | Mozambique   | -                 | Present study |
| HG03132  | L2a1b1  | CA      | Nigeria      | Esan              | 2             |
| HG02577  | L2a1b1  | AM      | Barbados     | African Caribbean | 2             |
| HG03202  | L2a1b1  | CA      | Nigeria      | Esan              | 2             |
| MOZ64    | L2a1b1a | SA      | Mozambique   | -                 | Present study |
| JX303858 | L2a1b1a | SA      | Zambia       | Mbukushu          | 13            |
| JX303761 | L2a1b1a | SA      | Zambia       | Tonga             | 13            |
| KJ185735 | L2a1b1a | SA      | Zambia       | Nkoya             | 9             |
| KJ185931 | L2a1b1a | SA      | Zambia       | Makoma            | 9             |
| KJ185825 | L2a1b1a | SA      | Angola       | Ovimbundu         | 9             |
| EU092690 | L2a1b1a | SA      | Mozambique   | Chopi             | 1             |
| EU092910 | L2a1b1a | EA      | Kenya        | -                 | 1             |
| KC622066 | L2a1b1a | SA      | Botswana     | Kalanga           | 10            |
| MOZ318   | L2a1b1a | SA      | Mozambique   | -                 | Present study |
| KJ185442 | L2a1b1a | SA      | Zambia       | Luvale            | 9             |
| JX303754 | L2a1b1a | SA      | Zambia       | Tonga             | 13            |
| KC622071 | L2a1b1a | SA      | Botswana     | Kalanga           | 10            |
| KJ185923 | L2a1b1a | SA      | Zambia       | Luyana            | 9             |
| JX303874 | L2a1b1a | SA      | Zambia       | Tonga             | 13            |
| JX303880 | L2a1b1a | SA      | Zambia       | Totela            | 13            |
| MOZ62    | L2a1b1a | SA      | Mozambique   | -                 | Present study |
| MOZ45    | L2a1b1a | SA      | Mozambique   | -                 | Present study |
| SOM13    | L2a1b1a | EA      | Somalia      | -                 | Present study |
| SOM144   | L2a1b1a | EA      | Somalia      | -                 | Present study |
| EU092705 | L2a1b1a | SA      | Mozambique   | -                 | 1             |
| KC622057 | L2a1b1a | SA      | Botswana     | Tswana            | 10            |
| KJ185588 | L2a1b1a | SA      | Zambia       | Lozi              | 9             |
| KJ185452 | L2a1b1a | SA      | Zambia       | Ila               | 9             |
| KC622062 | L2a1b1a | SA      | Botswana     | Tswana            | 10            |
| KJ185587 | L2a1b1a | SA      | Zambia       | Lozi              | 9             |
| EU092919 | L2a1b1a | AP / NE | Jordan       | -                 | 1             |
| JQ044973 | L2a1c   | WA      | Burkina Faso | -                 | 3             |
| DQ304949 | L2a1c   | AM      | USA          | -                 | 7             |
| DQ304944 | L2a1c   | AM      | USA          | -                 | 7             |
| EU092901 | L2a1c   | CA      | Chad         | Sara              | 1             |
| HM771224 | L2a1c   | CA      | Pygmy        | -                 | 14            |
| EU092733 | L2a1c   | WA      | G. Bissau    | Balanata          | 1             |
| EU092937 | L2a1c   | EA      | Ethiopia     | -                 | 1             |
| JN858955 | L2a1c   | CA      | Cameroon     | -                 | 11            |
| JQ702968 | L2a1c   | -       | unknown      | -                 | 8             |
| EU092683 | L2a1c   | AP / NE | Israel       | Palestinian       | 1             |
| KJ185486 | L2a1c   | SA      | Angola       | Ganguela          | 9             |
| JQ045019 | L2a1c   | WA      | Burkina Faso | -                 | 3             |
| JQ702307 | L2a1c   | -       | unknown      | -                 | 8             |

**Supplementary Table 3.** (continued)

|            |             |         |              |                   |               |
|------------|-------------|---------|--------------|-------------------|---------------|
| HG02808    | L2a1c       | WA      | Gambia       | -                 | 2             |
| JQ702503   | L2a1c       | AM      | Mexico       | -                 | 8             |
| HG02502    | L2a1c       | AM      | Barbados     | African Caribbean | 2             |
| HG02679    | L2a1c       | WA      | Gambia       | -                 | 2             |
| HG03078    | L2a1c       | WA      | Sierra Leone | Mende             | 2             |
| KJ185999   | L2a1c       | SA      | Zambia       | Nsenga            | 9             |
| ETH48      | L2a1c+16129 | EA      | Ethiopia     | -                 | Present study |
| FJ460560   | L2a1c1      | NA      | Tunisia      | -                 | 5             |
| JQ044909   | L2a1c1      | WA      | Burkina Faso | -                 | 3             |
| Howell561  | L2a1c1      | AM      | USA          | -                 | 4             |
| JQ044860   | L2a1c1      | WA      | Burkina Faso | -                 | 3             |
| JQ044974   | L2a1c1      | WA      | Burkina Faso | -                 | 3             |
| JQ045124   | L2a1c1      | WA      | Mandenka     | Mandenka          | 3             |
| JX303852   | L2a1c1      | SA      | Zambia       | Subiya            | 13            |
| KJ185731   | L2a1c1      | SA      | Zambia       | Nkoya             | 9             |
| KJ185595   | L2a1c1      | SA      | Zambia       | Lozi              | 9             |
| JQ045064   | L2a1c1      | WA      | Burkina Faso | -                 | 3             |
| JQ705046   | L2a1c1a     | WA      | Ghana        | -                 | 8             |
| JQ044799   | L2a1c1a     | WA      | Burkina Faso | -                 | 3             |
| Howell165  | L2a1c1a     | AM      | USA          | -                 | 4             |
| JQ702261   | L2a1c1a     | -       | unknown      | -                 | 8             |
| EU092954   | L2a1c1a     | EA      | Ethiopia     | -                 | 1             |
| JX524225   | L2a1c1a     | AM      | Brazil       | -                 | Family Tree   |
| HG03117    | L2a1c1a     | CA      | Nigeria      | Esan              | 2             |
| JQ044962   | L2a1c2      | WA      | Burkina Faso | -                 | 3             |
| JQ045108   | L2a1c2      | WA      | Mandenka     | Mandenka          | 3             |
| JQ044935   | L2a1c2      | WA      | Burkina Faso | -                 | 3             |
| JQ044844   | L2a1c2      | WA      | Burkina Faso | -                 | 3             |
| JQ044802   | L2a1c2      | WA      | Burkina Faso | -                 | 3             |
| HG02819    | L2a1c2      | WA      | Gambia       | -                 | 2             |
| JQ044998   | L2a1c2      | WA      | Burkina Faso | -                 | 3             |
| JQ045024   | L2a1c2      | WA      | Burkina Faso | -                 | 3             |
| JQ044828   | L2a1c2a     | WA      | Burkina Faso | -                 | 3             |
| JQ044924   | L2a1c2a     | WA      | Burkina Faso | -                 | 3             |
| HM771169   | L2a1c2a     | CA      | Pygmy        | -                 | 14            |
| Tor65(#27) | L2a1c2a     | AM      | Dominica     | -                 | 16            |
| JQ044872   | L2a1c2a     | WA      | Burkina Faso | -                 | 3             |
| JQ044969   | L2a1c2a     | WA      | Burkina Faso | -                 | 3             |
| JQ045025   | L2a1c2a     | WA      | Burkina Faso | -                 | 3             |
| HG03449    | L2a1c2a     | WA      | Sierra Leone | Mende             | 2             |
| EU200762   | L2a1c3      | EUR     | Slovenia     | -                 | 17            |
| EU092663   | L2a1c3      | AP / NE | Israel       | Bedouin           | 1             |
| JN214440   | L2a1c3      | EUR     | Spain        | Galicia           | 11            |
| HG03557    | L2a1c3      | WA      | Sierra Leone | Mende             | 2             |
| HG03571    | L2a1c3      | WA      | Sierra Leone | Mende             | 2             |
| JQ705145   | L2a1c3      | AM      | USA          | -                 | 8             |

**Supplementary Table 3.** (continued)

|           |               |     |              |                   |               |
|-----------|---------------|-----|--------------|-------------------|---------------|
| HG02861   | L2a1c3        | WA  | Gambia       | -                 | 2             |
| HG02895   | L2a1c3        | WA  | Gambia       | -                 | 2             |
| EU092720  | L2a1c3        | WA  | G. Bissau    | FulaForro         | 1             |
| JQ044996  | L2a1c3        | WA  | Burkina Faso | -                 | 3             |
| JQ045063  | L2a1c3        | WA  | Burkina Faso | -                 | 3             |
| HG02851   | L2a1c3        | WA  | Gambia       | -                 | 2             |
| JQ045122  | L2a1c3        | WA  | Mandenka     | Mandenka          | 3             |
| JQ045110  | L2a1c3        | WA  | Mandenka     | Mandenka          | 3             |
| JQ045116  | L2a1c3        | WA  | Mandenka     | Mandenka          | 3             |
| HG03088   | L2a1c3        | WA  | Sierra Leone | Mende             | 2             |
| JN214432  | L2a1c4        | EUR | Spain        | Andalusia         | 11            |
| DQ304942  | L2a1c4a       | AM  | USA          | -                 | 7             |
| DQ304943  | L2a1c4a       | AM  | USA          | -                 | 7             |
| JQ044833  | L2a1c4a       | WA  | Burkina Faso | -                 | 3             |
| JQ044957  | L2a1c4a       | WA  | Burkina Faso | -                 | 3             |
| JQ045014  | L2a1c4a       | WA  | Burkina Faso | -                 | 3             |
| JQ045035  | L2a1c4a       | WA  | Burkina Faso | -                 | 3             |
| JQ045045  | L2a1c4a       | WA  | Burkina Faso | -                 | 3             |
| JQ045067  | L2a1c4a       | WA  | Burkina Faso | -                 | 3             |
| JQ701926  | L2a1c4a       | -   | unknown      | -                 | 8             |
| FJ460549  | L2a1c4a       | NA  | Tunisia      | -                 | 5             |
| DQ304951  | L2a1c4a1      | AM  | USA          | -                 | 7             |
| DQ304950  | L2a1c4a1      | AM  | USA          | -                 | 7             |
| KJ185487  | L2a1c4a1      | SA  | Angola       | Ganguela          | 9             |
| KJ185488  | L2a1c4a1      | SA  | Angola       | Ganguela          | 9             |
| Howell576 | L2a1c5        | AM  | USA          | -                 | 4             |
| JQ705001  | L2a1c5        | -   | unknown      | -                 | 8             |
| HM771225  | L2a1c5        | CA  | Pygmy        | -                 | 14            |
| HG02546   | L2a1c5        | AM  | Barbados     | African Caribbean | 2             |
| JQ045082  | L2a1c5        | WA  | Yoruba       | Yoruba            | 3             |
| JQ045098  | L2a1c5        | WA  | Yoruba       | Yoruba            | 3             |
| EU935443  | L2a1c5        | NA  | Egypt        | el-Hayez oasis    | 18            |
| HG02455   | L2a1c5        | AM  | Barbados     | African Caribbean | 2             |
| HG02549   | L2a1c5        | AM  | Barbados     | African Caribbean | 2             |
| JX303749  | L2a1c5        | SA  | Zambia       | Totela            | 13            |
| KJ185585  | L2a1c5        | SA  | Zambia       | Lozi              | 9             |
| KJ185584  | L2a1c5        | SA  | Zambia       | Lozi              | 9             |
| KJ185468  | L2a1c5        | SA  | Zambia       | Tonga             | 9             |
| EF177417  | <u>L2a1c6</u> | EUR | Portugal     | -                 | 15            |
| JQ702659  | <u>L2a1c6</u> | EUR | France       | -                 | 8             |
| JN214436  | <u>L2a1c6</u> | EUR | Spain        | Galicia           | 11            |
| NA20903   | L2a1d         | AM  | USA          | Gujarati Indian   | 2             |
| EU092939  | L2a1d1        | EA  | Ethiopia     | -                 | 1             |
| SOM01     | L2a1d1        | EA  | Somalia      | -                 | Present study |
| EU092765  | L2a1d1        | NA  | Egypt        | -                 | 1             |
| EU092927  | L2a1d1        | NA  | Egypt        | -                 | 1             |

**Supplementary Table 3. (continued)**

|           |                |    |              |          |               |
|-----------|----------------|----|--------------|----------|---------------|
| SUD54     | L2a1d1         | EA | Sudan        | -        | Present study |
| KJ185403  | L2a1d2         | SA | Zambia       | Bemba    | 9             |
| JN858956  | L2a1d2         | WA | Benin        | -        | 11            |
| JX303806  | <u>L2a1d2a</u> | SA | Zambia       | Kwamashi | 13            |
| JX303862  | <u>L2a1d2a</u> | SA | Zambia       | Mbukushu | 13            |
| JX303873  | <u>L2a1d2a</u> | SA | Zambia       | Tonga    | 13            |
| KJ185686  | <u>L2a1d2a</u> | SA | Zambia       | Mbunda   | 9             |
| KJ185591  | <u>L2a1d2a</u> | SA | Zambia       | Lozi     | 9             |
| JX303795  | <u>L2a1d2a</u> | SA | Zambia       | Totela   | 13            |
| JX303825  | <u>L2a1d2a</u> | SA | Zambia       | Mbukushu | 13            |
| JX303838  | <u>L2a1d2a</u> | SA | Zambia       | Mbukushu | 13            |
| KC622074  | <u>L2a1d2a</u> | SA | Botswana     | Tswana   | 10            |
| KJ185459  | <u>L2a1d2a</u> | SA | Zambia       | Tokaleya | 9             |
| KJ185998  | <u>L2a1d2a</u> | SA | Zambia       | Nsenga   | 9             |
| KJ185691  | <u>L2a1d2a</u> | SA | Zambia       | Mbunda   | 9             |
| KJ185428  | <u>L2a1d2a</u> | SA | Zambia       | Luchazi  | 9             |
| KJ185689  | <u>L2a1d2a</u> | SA | Zambia       | Mbunda   | 9             |
| KJ185590  | <u>L2a1d2a</u> | SA | Zambia       | Lozi     | 9             |
| KJ185898  | <u>L2a1d2a</u> | SA | Zambia       | Kwangwa  | 9             |
| KJ185586  | <u>L2a1d2a</u> | SA | Zambia       | Lozi     | 9             |
| KJ185955  | <u>L2a1d2a</u> | SA | Zambia       | Nyengo   | 9             |
| KJ185939  | <u>L2a1d2a</u> | SA | Zambia       | Mbowe    | 9             |
| KJ185901  | <u>L2a1d2a</u> | SA | Zambia       | Kwangwa  | 9             |
| MOZ342    | <u>L2a1d2a</u> | SA | Mozambique   | -        | Present study |
| Howell389 | L2a1e          | AM | USA          | -        | 4             |
| DQ304945  | L2a1e          | AM | USA          | -        | 7             |
| Howell172 | L2a1e1         | AM | USA          | -        | 4             |
| JQ705455  | L2a1e1         | -  | unknown      | -        | 8             |
| JQ044821  | L2a1e1         | WA | Burkina Faso | -        | 3             |
| JQ044970  | L2a1e1         | WA | Burkina Faso | -        | 3             |
| DQ304946  | L2a1e1         | AM | USA          | -        | 7             |
| DQ304947  | L2a1e1         | AM | USA          | -        | 7             |
| Howell421 | L2a1e1         | AM | USA          | -        | 4             |
| DQ304930  | L2a1e1         | AM | USA          | -        | 7             |
| DQ304929  | L2a1e1         | AM | USA          | -        | 7             |
| DQ304931  | L2a1e1         | AM | USA          | -        | 7             |
| JQ044883  | L2a1f          | WA | Burkina Faso | -        | 3             |
| DQ304935  | L2a1f          | AM | USA          | -        | 7             |
| Howell566 | L2a1f          | AM | USA          | -        | 4             |
| KJ185678  | L2a1f          | SA | Zambia       | Mbunda   | 9             |
| Howell223 | L2a1f          | AM | USA          | -        | 4             |
| DQ304936  | L2a1f          | AM | USA          | -        | 7             |
| JQ044912  | L2a1f          | WA | Burkina Faso | -        | 3             |
| JQ045056  | L2a1f          | WA | Burkina Faso | -        | 3             |
| JQ045087  | L2a1f          | WA | Yoruba       | Yoruba   | 3             |
| HG03452   | L2a1f          | WA | Sierra Leone | Mende    | 2             |

**Supplementary Table 3.** (continued)

|           |        |    |              |                   |    |
|-----------|--------|----|--------------|-------------------|----|
| KJ185728  | L2a1f  | SA | Zambia       | Nkoya             | 9  |
| KJ185899  | L2a1f  | SA | Zambia       | Kwangwa           | 9  |
| NA19023   | L2a1f  | EA | Kenya        | Luhya             | 2  |
| KJ185429  | L2a1f  | SA | Zambia       | Luchazi           | 9  |
| KJ185897  | L2a1f  | SA | Zambia       | Kwangwa           | 9  |
| KJ185893  | L2a1f  | SA | Zambia       | Kwangwa           | 9  |
| KJ185680  | L2a1f  | SA | Zambia       | Mbunda            | 9  |
| JX303832  | L2a1f  | SA | Zambia       | Subiya            | 13 |
| DQ304954  | L2a1f  | AM | USA          | -                 | 7  |
| JQ705150  | L2a1f  | -  | unknown      | -                 | 8  |
| DQ304953  | L2a1f  | AM | USA          | -                 | 7  |
| DQ304956  | L2a1f  | AM | USA          | -                 | 7  |
| DQ304952  | L2a1f  | AM | USA          | -                 | 7  |
| JQ704668  | L2a1f  | -  | unknown      | -                 | 8  |
| DQ304966  | L2a1f  | AM | USA          | -                 | 7  |
| JQ703960  | L2a1f  | -  | unknown      | -                 | 8  |
| JQ044859  | L2a1f  | WA | Burkina Faso | -                 | 3  |
| Howell567 | L2a1f  | AM | USA          | -                 | 4  |
| HG03159   | L2a1f  | CA | Nigeria      | Esan              | 2  |
| JQ045006  | L2a1f  | WA | Burkina Faso | -                 | 3  |
| HG03514   | L2a1f  | CA | Nigeria      | Esan              | 2  |
| JQ045061  | L2a1f  | WA | Burkina Faso | -                 | 3  |
| HG02979   | L2a1f  | CA | Nigeria      | Esan              | 2  |
| HG02885   | L2a1f  | WA | Gambia       | -                 | 2  |
| HG03199   | L2a1f  | CA | Nigeria      | Esan              | 2  |
| AY195776  | L2a1f  | SA | S. Africa    | -                 | 19 |
| KC622076  | L2a1f  | SA | Botswana     | Tswana            | 10 |
| KJ185681  | L2a1f  | SA | Zambia       | Mbunda            | 9  |
| KJ185683  | L2a1f  | SA | Zambia       | Mbunda            | 9  |
| KJ185985  | L2a1f  | SA | Zambia       | Mambwe            | 9  |
| Howell233 | L2a1f  | AM | USA          | -                 | 4  |
| Howell565 | L2a1f  | AM | USA          | -                 | 4  |
| DQ304959  | L2a1f  | AM | USA          | -                 | 7  |
| DQ304962  | L2a1f  | AM | USA          | -                 | 7  |
| DQ304965  | L2a1f  | AM | USA          | -                 | 7  |
| JQ045090  | L2a1f  | WA | Yoruba       | Yoruba            | 3  |
| DQ304960  | L2a1f1 | AM | USA          | -                 | 7  |
| DQ304963  | L2a1f1 | AM | USA          | -                 | 7  |
| DQ304964  | L2a1f1 | AM | USA          | -                 | 7  |
| EU092961  | L2a1f1 | AM | USA          | -                 | 1  |
| HG03575   | L2a1f1 | WA | Sierra Leone | Mende             | 2  |
| JQ701814  | L2a1f1 | AM | USA          | -                 | 8  |
| DQ304961  | L2a1f1 | AM | USA          | -                 | 7  |
| DQ304955  | L2a1f1 | AM | USA          | -                 | 7  |
| KJ185685  | L2a1f1 | SA | Zambia       | Mbunda            | 9  |
| HG02557   | L2a1f1 | AM | Barbados     | African Caribbean | 2  |



**Supplementary Table 3.** (continued)

|           |         |         |              |                   |               |
|-----------|---------|---------|--------------|-------------------|---------------|
| HG03135   | L2a1f1  | CA      | Nigeria      | Esan              | 2             |
| KJ186002  | L2a1f1  | SA      | Zambia       | Tumbuka           | 9             |
| KJ185933  | L2a1f1  | SA      | Zambia       | Makoma            | 9             |
| DQ304967  | L2a1f1  | AM      | USA          | -                 | 7             |
| HG02476   | L2a1f1  | AM      | Barbados     | African Caribbean | 2             |
| HG03297   | L2a1f1  | CA      | Nigeria      | Esan              | 2             |
| DQ304937  | L2a1f1  | AM      | USA          | -                 | 7             |
| HG03163   | L2a1f1  | CA      | Nigeria      | Esan              | 2             |
| Howell208 | L2a1f1  | AM      | USA          | -                 | 4             |
| JX303780  | L2a1f1  | SA      | Zambia       | Tonga             | 13            |
| DQ304958  | L2a1f1a | AM      | USA          | -                 | 7             |
| DQ304934  | L2a1f1a | AM      | USA          | -                 | 7             |
| JQ045097  | L2a1f2  | WA      | Yoruba       | Yoruba            | 3             |
| JQ045039  | L2a1f2  | WA      | Burkina Faso | -                 | 3             |
| DQ304957  | L2a1f2  | AM      | USA          | -                 | 7             |
| HG02481   | L2a1f2  | AM      | Barbados     | African Caribbean | 2             |
| EU597561  | L2a1f3  | EA      | Kenya        | -                 | 6             |
| JX303805  | L2a1f3  | SA      | Zambia       | Kwamashi          | 13            |
| KJ185583  | L2a1f3  | SA      | Zambia       | Lozi              | 9             |
| KJ185596  | L2a1f3  | SA      | Zambia       | Lozi              | 9             |
| KJ185582  | L2a1f3  | SA      | Zambia       | Lozi              | 9             |
| KC622118  | L2a1f3  | SA      | Botswana     | Kgalagadi         | 10            |
| KJ185895  | L2a1f3  | SA      | Zambia       | Kwangwa           | 9             |
| JQ044861  | L2a1f3  | WA      | Burkina Faso | -                 | 3             |
| JX303752  | L2a1g   | SA      | Zambia       | Tonga             | 13            |
| JX303906  | L2a1g   | SA      | Zambia       | Subiya            | 13            |
| KJ185894  | L2a1g   | SA      | Zambia       | Kwangwa           | 9             |
| KJ185693  | L2a1g   | SA      | Zambia       | Mbunda            | 9             |
| JX303798  | L2a1g   | SA      | Zambia       | Totela            | 13            |
| EU092676  | L2a1h   | AP / NE | Israel       | Palestinian       | 1             |
| EU092914  | L2a1h   | EA      | Kenya        | -                 | 1             |
| KJ186003  | L2a1h   | SA      | Zambia       | Tumbuka           | 9             |
| MOZ301    | L2a1h   | SA      | Mozambique   | -                 | Present study |
| JQ044905  | L2a1i   | WA      | Burkina Faso | -                 | 3             |
| JQ045077  | L2a1i   | WA      | Burkina Faso | -                 | 3             |
| Howell388 | L2a1i   | AM      | USA          | -                 | 4             |
| HG03432   | L2a1i   | WA      | Sierra Leone | Mende             | 2             |
| HG03461   | L2a1i   | WA      | Sierra Leone | Mende             | 2             |
| EU092719  | L2a1i   | WA      | G. Bissau    | FulaForro         | Behar, 2008   |
| HG03064   | L2a1i   | WA      | Sierra Leone | Mende             | 2             |
| JQ044958  | L2a1i   | WA      | Burkina Faso | -                 | 3             |
| JQ045080  | L2a1i   | WA      | Burkina Faso | -                 | 3             |
| JQ045102  | L2a1i   | WA      | Yoruba       | Yoruba            | 3             |
| JQ044881  | L2a1i1  | WA      | Burkina Faso | -                 | 3             |
| Howell193 | L2a1i1  | AM      | USA          | -                 | 4             |
| HG02554   | L2a1i1  | AM      | Barbados     | African Caribbean | 2             |

**Supplementary Table 3. (continued)**

|           |         |         |              |          |               |
|-----------|---------|---------|--------------|----------|---------------|
| AF346976  | L2a1i1  | -       | unknown      | Effik    | 12            |
| NA18878   | L2a1i1  | CA      | Nigeria      | Yoruba   | 2             |
| JX303857  | L2a1i1  | SA      | Zambia       | Fwe      | 13            |
| KC622169  | L2a1i1  | SA      | Namibia      | Mbukushu | 10            |
| KJ185597  | L2a1i1  | SA      | Zambia       | Lozi     | 9             |
| KJ185598  | L2a1i1  | SA      | Zambia       | Lozi     | 9             |
| JX303909  | L2a1i1  | SA      | Zambia       | Subiya   | 13            |
| KJ185690  | L2a1i1  | SA      | Zambia       | Mbunda   | 9             |
| JX303853  | L2a1i1  | SA      | Zambia       | Fwe      | 13            |
| KJ185900  | L2a1i1  | SA      | Zambia       | Kwangwa  | 9             |
| SOM64     | L2a1j   | EA      | Somalia      | -        | Present study |
| EU092756  | L2a1j   | AP / NE | Jordan       | -        | 1             |
| EU092816  | L2a1j   | NA      | Morocco      | Arab     | 1             |
| EU200760  | L2a1k   | EUR     | Czech Rep    | -        | 17            |
| EU200763  | L2a1k   | EUR     | Slovenia     | -        | 17            |
| JQ045047  | L2a1l   | WA      | Burkina Faso | -        | 3             |
| JQ044956  | L2a1l1  | WA      | Burkina Faso | -        | 3             |
| JQ044919  | L2a1l1  | WA      | Burkina Faso | -        | 3             |
| JQ044955  | L2a1l1  | WA      | Burkina Faso | -        | 3             |
| HG01286   | L2a1l1  | AM      | Puerto Rico  | -        | 2             |
| HG03428   | L2a1l1  | WA      | Sierra Leone | Mende    | 2             |
| HG03457   | L2a1l1  | WA      | Sierra Leone | Mende    | 2             |
| HG03382   | L2a1l1  | WA      | Sierra Leone | Mende    | 2             |
| HG03097   | L2a1l1  | WA      | Sierra Leone | Mende    | 2             |
| HG02568   | L2a1l1  | WA      | Gambia       | -        | 2             |
| HG03401   | L2a1l1  | WA      | Sierra Leone | Mende    | 2             |
| HG03085   | L2a1l1  | WA      | Sierra Leone | Mende    | 2             |
| HG03547   | L2a1l1  | WA      | Sierra Leone | Mende    | 2             |
| JQ044817  | L2a1l1a | WA      | Burkina Faso | -        | 3             |
| EU092812  | L2a1l1a | NA      | Morocco      | Arab     | 1             |
| FJ769771  | L2a1l1a | AM      | Bahamas      | -        | Family Tree   |
| JQ044966  | L2a1l1a | WA      | Burkina Faso | -        | 3             |
| JQ044897  | L2a1l1a | WA      | Burkina Faso | -        | 3             |
| DQ304939  | L2a1l1a | AM      | USA          | -        | 7             |
| JQ044932  | L2a1l1a | WA      | Burkina Faso | -        | 3             |
| EU092807  | L2a1l1a | NA      | Morocco      | -        | 1             |
| EU092721  | L2a1l2  | WA      | G. Bissau    | Mandinga | 1             |
| HG02716   | L2a1l2  | WA      | Gambia       | -        | 2             |
| HG02620   | L2a1l2  | WA      | Gambia       | -        | 2             |
| HG02629   | L2a1l2  | WA      | Gambia       | -        | 2             |
| JQ044978  | L2a1l2  | WA      | Burkina Faso | -        | 3             |
| JQ044994  | L2a1l2  | WA      | Burkina Faso | -        | 3             |
| JQ705185  | L2a1l2a | EUR     | Russia       | Jew      | 8             |
| JQ705049  | L2a1l2a | EUR     | Poland       | Jew      | 8             |
| Howell401 | L2a1l2a | AM      | USA          | -        | 4             |
| Howell564 | L2a1l2a | AM      | USA          | -        | 4             |

Supplementary Table 3. (continued)

|           |              |         |              |           |               |
|-----------|--------------|---------|--------------|-----------|---------------|
| EU092687  | L2a1I2a      | AP / NE | Israel       | Ashkenazi | 1             |
| EU547188  | L2a1I2a      | EUR     | Poland       | Jew       | Family Tree   |
| JN204423  | L2a1I2a      | EUR     | Poland       | Jew       | Family Tree   |
| JX266264  | L2a1I2a      | EUR     | Poland       | Podhale   | 20            |
| JQ705589  | L2a1I2a1     | EUR     | Romania      | -         | 8             |
| EU564850  | L2a1I2a2     | -       | unknown      | -         | Family Tree   |
| JQ702015  | L2a1I2a3     | EUR     | Poland       | Jew       | 8             |
| JQ702904  | L2a1I2a4     | -       | unknown      | -         | 8             |
| JX266265  | L2a1I2a5     | EUR     | Poland       | Kashubia  | 20            |
| JQ044804  | L2a1m        | WA      | Burkina Faso | -         | 3             |
| JQ045040  | L2a1m        | WA      | Burkina Faso | -         | 3             |
| JQ044916  | L2a1m        | WA      | Burkina Faso | -         | 3             |
| DQ304940  | L2a1m1       | AM      | USA          | -         | 7             |
| Howell563 | L2a1m1       | AM      | USA          | -         | 4             |
| JQ701914  | L2a1m1       | EUR     | Ireland      | -         | 8             |
| DQ304938  | L2a1m1       | AM      | USA          | -         | 7             |
| JQ044908  | L2a1m1       | WA      | Burkina Faso | -         | 3             |
| JQ703065  | L2a1n        | -       | unknown      | -         | 8             |
| JQ044944  | L2a1n        | WA      | Burkina Faso | -         | 3             |
| DQ304941  | L2a1n        | AM      | USA          | -         | 7             |
| JQ045000  | L2a1o        | WA      | Burkina Faso | -         | 3             |
| EU092739  | L2a1o        | AP / NE | Syria        | -         | 1             |
| JX303870  | L2a1q        | SA      | Zambia       | Fwe       | 13            |
| KC622159  | L2a1q        | SA      | Namibia      | Kwanyama  | 10            |
| NA19381   | L2a1q        | EA      | Kenya        | Luhya     | 2             |
| SOM49     | <u>L2a1r</u> | EA      | Somalia      | -         | Present study |
| SOM17     | <u>L2a1r</u> | EA      | Somalia      | -         | Present study |
| SOM59     | <u>L2a1r</u> | EA      | Somalia      | -         | Present study |
| SOM96     | <u>L2a1r</u> | EA      | Somalia      | -         | Present study |
| SOM81     | <u>L2a1r</u> | EA      | Somalia      | -         | Present study |
| EU092896  | L2a2a        | CA      | Chad         | Sara      | 1             |
| SUD102    | L2a2a        | EA      | Sudan        | -         | Present study |
| HM771205  | L2a2a1       | CA      | Pygmy        | -         | 14            |
| SUD75     | L2a2a1       | EA      | Sudan        | -         | Present study |
| EU092902  | L2a2a1       | CA      | Chad         | Sara      | 1             |
| EU092882  | L2a2a1       | CA      | Chad         | Sara      | 1             |
| HM771191  | L2a2b        | CA      | Pygmy        | -         | 14            |
| HM771207  | L2a2b        | CA      | Pygmy        | -         | 14            |
| KJ185986  | L2a2b        | SA      | Zambia       | Mambwe    | 9             |
| EU597525  | L2a2b1       | CA      | Mbuti Pygmy  | -         | 6             |
| HM771193  | L2a2b1       | CA      | Pygmy        | -         | 14            |
| AY195788  | L2a2b1       | SA      | S. Africa    | San       | 19            |
| HM771192  | L2a2b1       | CA      | Pygmy        | -         | 14            |
| EU597549  | L2a2b1       | CA      | Mbuti Pygmy  | -         | 6             |
| HM771194  | L2a2b1       | CA      | Pygmy        | -         | 14            |
| HM771208  | L2a2b1       | CA      | Pygmy        | -         | 14            |

**Supplementary Table 3.** (continued)

|            |                 |         |              |           |             |
|------------|-----------------|---------|--------------|-----------|-------------|
| HM771195   | L2a2b1          | CA      | Pygmy        | -         | 14          |
| HM771206   | L2a3            | CA      | Pygmy        | -         | 14          |
| HM771197   | L2a4a           | CA      | Pygmy        | -         | 14          |
| HM771213   | L2a4a           | CA      | Pygmy        | -         | 14          |
| HM771210   | L2a4a           | CA      | Pygmy        | -         | 14          |
| HM771209   | L2a4a           | CA      | Pygmy        | -         | 14          |
| HM771214   | L2a4a           | CA      | Pygmy        | -         | 14          |
| HM771211   | L2a4a           | CA      | Pygmy        | -         | 14          |
| HM771196   | L2a4a           | CA      | Pygmy        | -         | 14          |
| HM771212   | L2a4a           | CA      | Pygmy        | -         | 14          |
| HM771215   | L2a4a           | CA      | Pygmy        | -         | 14          |
| KJ185525   | L2a5            | SA      | Angola       | Kuvale    | 9           |
| NA19045    | <u>L2a5a</u>    | EA      | Kenya        | Luhya     | 2           |
| HQ384199   | <u>L2a5a</u>    | EUR     | Spain        | -         | 21          |
| HM596745   | <u>L2a5a1a1</u> | AM      | Bermuda      | -         | Family Tree |
| JX303829   | <u>L2a5a1a1</u> | SA      | Zambia       | Kwamashi  | 13          |
| KJ185684   | <u>L2a5a1a1</u> | SA      | Zambia       | Mbunda    | 9           |
| KJ185687   | <u>L2a5a1a1</u> | SA      | Zambia       | Mbunda    | 9           |
| KJ185682   | <u>L2a5a1a1</u> | SA      | Zambia       | Mbunda    | 9           |
| KJ185952   | <u>L2a5a1a1</u> | SA      | Zambia       | Nyengo    | 9           |
| KJ185734   | <u>L2a5a1a1</u> | SA      | Zambia       | Nkoya     | 9           |
| KJ185953   | <u>L2a5a1a2</u> | SA      | Zambia       | Nyengo    | 9           |
| KJ185592   | <u>L2a5a1a2</u> | SA      | Zambia       | Lozi      | 9           |
| KJ185954   | <u>L2a5a1a2</u> | SA      | Zambia       | Nyengo    | 9           |
| KJ185942   | <u>L2a5a1a2</u> | SA      | Zambia       | Mwenyi    | 9           |
| KJ185932   | <u>L2a5a1a2</u> | SA      | Zambia       | Makoma    | 9           |
| KJ185730   | <u>L2a5a1a2</u> | SA      | Zambia       | Nkoya     | 9           |
| KJ185729   | <u>L2a5a1a2</u> | SA      | Zambia       | Nkoya     | 9           |
| KJ185427   | <u>L2a5a1b</u>  | SA      | Zambia       | Luchazi   | 9           |
| KJ185830   | <u>L2a5a1b</u>  | SA      | Angola       | Ovimbundu | 9           |
| KJ185441   | <u>L2a5a1b</u>  | SA      | Zambia       | Luvale    | 9           |
| KJ185593   | <u>L2a5a1b</u>  | SA      | Zambia       | Lozi      | 9           |
| KJ185594   | <u>L2a5a1b</u>  | SA      | Zambia       | Lozi      | 9           |
| KJ185823   | <u>L2a5a1b</u>  | SA      | Angola       | Ovimbundu | 9           |
| JN214443   | L2b             | EUR     | Spain        | Galicia   | 11          |
| EU092734   | L2b             | WA      | G. Bissau    | Mandinga  | 1           |
| HG02645    | L2b             | WA      | Gambia       | -         | 2           |
| JQ045008   | L2b             | WA      | Burkina Faso | -         | 3           |
| EU092747   | L2b1            | AP / NE | S. Arabia    | -         | 1           |
| EU092766   | L2b1            | NA      | Egypt        | -         | 1           |
| HG02982    | L2b1a           | WA      | Gambia       | -         | 2           |
| JQ044854   | L2b1a           | WA      | Burkina Faso | -         | 3           |
| HG03291    | L2b1a           | CA      | Nigeria      | Esan      | 2           |
| Tor66(#26) | L2b1a           | AM      | Dominica     | -         | 16          |
| HG01403    | L2b1a           | AM      | Puerto Rico  | -         | 2           |
| DQ304981   | L2b1a           | AM      | USA          | -         | 7           |

Supplementary Table 3. (continued)

|           |        |         |              |                  |             |
|-----------|--------|---------|--------------|------------------|-------------|
| HG02760   | L2b1a  | WA      | Gambia       | -                | 2           |
| Howell175 | L2b1a  | AM      | USA          | -                | 4           |
| HG03472   | L2b1a  | WA      | Sierra Leone | Mende            | 2           |
| EU092664  | L2b1a2 | AP / NE | Israel       | Bedouin          | 1           |
| EU092722  | L2b1a2 | WA      | G. Bissau    | Manjaco          | 1           |
| DQ304985  | L2b1a2 | AM      | USA          | -                | 7           |
| HG02887   | L2b1a2 | WA      | Gambia       | -                | 2           |
| HG03046   | L2b1a2 | WA      | Gambia       | -                | 2           |
| JQ045013  | L2b1a2 | WA      | Burkina Faso | -                | 3           |
| JQ044890  | L2b1a2 | WA      | Burkina Faso | -                | 3           |
| JQ045037  | L2b1a2 | WA      | Burkina Faso | -                | 3           |
| DQ304978  | L2b1a3 | AM      | USA          | -                | 7           |
| DQ304979  | L2b1a3 | AM      | USA          | -                | 7           |
| DQ304980  | L2b1a3 | AM      | USA          | -                | 7           |
| DQ304982  | L2b1a3 | AM      | USA          | -                | 7           |
| DQ304983  | L2b1a3 | AM      | USA          | -                | 7           |
| DQ304984  | L2b1a3 | AM      | USA          | -                | 7           |
| HG03515   | L2b1a3 | CA      | Nigeria      | Esan             | 2           |
| AY195766  | L2b1a3 | SA      | S. Africa    | -                | 19          |
| EU092854  | L2b1a3 | SA      | S. Africa    | San              | 1           |
| KJ185460  | L2b1a3 | SA      | Zambia       | Tokaleya         | 9           |
| KJ185857  | L2b1a3 | SA      | Zambia       | Ovimbundu        | 9           |
| FJ460535  | L2b1a3 | NA      | Tunisia      | -                | 5           |
| KJ185956  | L2b1a3 | SA      | Zambia       | Nyengo           | 9           |
| KJ185832  | L2b1a3 | SA      | Angola       | Ovimbundu        | 9           |
| KJ185489  | L2b1a3 | SA      | Angola       | Ganguela         | 9           |
| KJ185772  | L2b1a3 | SA      | Angola       | Nyaneka          | 9           |
| KJ185443  | L2b1a3 | SA      | Zambia       | Luvale           | 9           |
| KJ185600  | L2b1a3 | SA      | Zambia       | Lozi             | 9           |
| JQ701833  | L2b1a3 | EUR     | unknown      | African European | 8           |
| JQ702694  | L2b1a3 | -       | unknown      | -                | 8           |
| JX303882  | L2b1a3 | SA      | Zambia       | Shanjo           | 13          |
| KJ185869  | L2b1a3 | SA      | Zambia       | Kwamulonga       | 9           |
| KJ185599  | L2b1a3 | SA      | Zambia       | Lozi             | 9           |
| NA19024   | L2b1a3 | EA      | Kenya        | Luhya            | 2           |
| Howell568 | L2b1a4 | AM      | USA          | -                | 4           |
| JN214453  | L2b1a4 | EUR     | Italy        | Liguria          | 11          |
| JN214454  | L2b1a4 | EUR     | Italy        | Liguria          | 11          |
| JQ044800  | L2b1b  | WA      | Burkina Faso | -                | 3           |
| HG02952   | L2b1b  | CA      | Nigeria      | Esan             | 2           |
| Howell574 | L2b1b  | AM      | USA          | -                | 4           |
| FJ228403  | L2b1b  | WA      | Senegal      | -                | Family Tree |
| HM771226  | L2b1b  | CA      | Pygmy        | -                | 14          |
| KJ185444  | L2b1b  | SA      | Zambia       | Luvale           | 9           |
| JQ044910  | L2b2   | WA      | Burkina Faso | -                | 3           |
| EU092692  | L2b2   | SA      | Mozambique   | Ronga            | 1           |

**Supplementary Table 3.** (continued)

|           |       |    |              |                   |               |
|-----------|-------|----|--------------|-------------------|---------------|
| KJ185974  | L2b2  | SA | Zambia       | Kaonde            | 9             |
| SUD87     | L2b2  | EA | Sudan        | -                 | Present study |
| JQ044797  | L2b2  | WA | Burkina Faso | -                 | 3             |
| JQ045043  | L2b2  | WA | Burkina Faso | -                 | 3             |
| JQ044846  | L2b2a | WA | Burkina Faso | -                 | 3             |
| STP84     | L2b2a | WA | STP          | -                 | Present study |
| JX303841  | L2b2a | SA | Zambia       | Kwamashi          | 13            |
| KJ185694  | L2b2a | SA | Zambia       | Mbunda            | 9             |
| JX303807  | L2b2a | SA | Zambia       | Kwamashi          | 13            |
| KJ185833  | L2b2a | SA | Angola       | Ovimbundu         | 9             |
| KJ185831  | L2b2a | SA | Angola       | Ovimbundu         | 9             |
| EU092661  | L2b3  | EA | Ethiopia     | -                 | 1             |
| FJ460526  | L2b3  | NA | Tunisia      | -                 | 5             |
| HG02804   | L2b3  | WA | Gambia       | -                 | 2             |
| HG02595   | L2b3  | WA | Gambia       | -                 | 2             |
| HG02837   | L2b3  | WA | Gambia       | -                 | 2             |
| HG02555   | L2b3  | AM | Barbados     | African Caribbean | 2             |
| JQ702123  | L2b3a | AM | Hawaii       | -                 | 8             |
| Howell222 | L2b3a | AM | USA          | -                 | 4             |
| JQ702626  | L2b3a | -  | unknown      | -                 | 8             |
| Howell385 | L2b3a | AM | USA          | -                 | 4             |
| JQ044882  | L2c   | WA | Burkina Faso | -                 | 3             |
| STP43     | L2c   | WA | STP          | -                 | Present study |
| JQ701954  | L2c   | -  | unknown      | -                 | 8             |
| HG03484   | L2c   | WA | Sierra Leone | Mende             | 2             |
| EU092723  | L2c   | WA | G. Bissau    | Fula              | 1             |
| JQ705120  | L2c   | -  | unknown      | -                 | 8             |
| HG03376   | L2c   | WA | Sierra Leone | Mende             | 2             |
| HG03451   | L2c   | WA | Sierra Leone | Mende             | 2             |
| HG03473   | L2c   | WA | Sierra Leone | Mende             | 2             |
| HG02703   | L2c   | WA | Gambia       | -                 | 2             |
| JQ702169  | L2c   | -  | unknown      | -                 | 8             |
| JQ044878  | L2c   | WA | Burkina Faso | -                 | 3             |
| JQ044941  | L2c   | WA | Burkina Faso | -                 | 3             |
| HG03049   | L2c   | WA | Gambia       | -                 | 2             |
| KJ185773  | L2c   | SA | Angola       | Nyaneka           | 9             |
| HG03433   | L2c   | WA | Sierra Leone | Mende             | 2             |
| HG03455   | L2c   | WA | Sierra Leone | Mende             | 2             |
| HG03476   | L2c   | WA | Sierra Leone | Mende             | 2             |
| HG03091   | L2c   | WA | Sierra Leone | Mende             | 2             |
| HG03225   | L2c   | WA | Sierra Leone | Mende             | 2             |
| HG02814   | L2c   | WA | Gambia       | -                 | 2             |
| HG02882   | L2c   | WA | Gambia       | -                 | 2             |
| HG02888   | L2c   | WA | Gambia       | -                 | 2             |
| HG02624   | L2c   | WA | Gambia       | -                 | 2             |
| HG02642   | L2c   | WA | Gambia       | -                 | 2             |

**Supplementary Table 3. (continued)**

|            |         |         |              |                   |    |
|------------|---------|---------|--------------|-------------------|----|
| JQ044989   | L2c1    | WA      | Burkina Faso | -                 | 3  |
| JQ044858   | L2c1    | WA      | Burkina Faso | -                 | 3  |
| JQ045002   | L2c1    | WA      | Burkina Faso | -                 | 3  |
| HG02759    | L2c1    | WA      | Gambia       | -                 | 2  |
| HG02505    | L2c1    | AM      | Barbados     | African Caribbean | 2  |
| EU092813   | L2c1a   | NA      | Morocco      | -                 | 1  |
| JN214433   | L2c1a   | EUR     | Spain        | Andalusia         | 11 |
| HG03048    | L2c1a   | WA      | Gambia       | -                 | 2  |
| JQ045106   | L2c1a   | WA      | Mandenka     | Mandenka          | 3  |
| JQ045105   | L2c1a   | WA      | Mandenka     | Mandenka          | 3  |
| JQ045068   | L2c1a   | WA      | Burkina Faso | -                 | 3  |
| JQ045022   | L2c1a   | WA      | Burkina Faso | -                 | 3  |
| JQ044887   | L2c1a   | WA      | Burkina Faso | -                 | 3  |
| JQ044901   | L2c1a   | WA      | Burkina Faso | -                 | 3  |
| AF381981   | L2c1a   | NA      | Mauritania   | -                 | 22 |
| EU092754   | L2c2    | AP / NE | Lebanon      | -                 | 1  |
| EU092697   | L2c2    | SA      | Mozambique   | Mozambique        | 1  |
| JQ045042   | L2c2    | WA      | Burkina Faso | -                 | 3  |
| Tor67(#08) | L2c2    | AM      | Dominica     | -                 | 16 |
| DQ304986   | L2c2    | AM      | USA          | -                 | 7  |
| Howell573  | L2c2    | AM      | USA          | -                 | 4  |
| HG03069    | L2c2    | WA      | Sierra Leone | Mende             | 2  |
| HG03388    | L2c2    | WA      | Sierra Leone | Mende             | 2  |
| DQ304989   | L2c2    | AM      | USA          | -                 | 7  |
| JQ044920   | L2c2    | WA      | Burkina Faso | -                 | 3  |
| JQ045010   | L2c2    | WA      | Burkina Faso | -                 | 3  |
| HG02836    | L2c2    | WA      | Gambia       | -                 | 2  |
| DQ304988   | L2c2a   | AM      | USA          | -                 | 7  |
| EU092955   | L2c2a   | AM      | USA          | -                 | 1  |
| EU092957   | L2c2a   | AM      | USA          | -                 | 1  |
| JQ704740   | L2c2a1  | -       | unknown      | -                 | 8  |
| HG03157    | L2c2a1  | CA      | Nigeria      | Esan              | 2  |
| DQ304987   | L2c2a1  | AM      | USA          | -                 | 7  |
| KJ185994   | L2c2a1  | SA      | Zambia       | Ndundulu          | 9  |
| KJ185603   | L2c2a1  | SA      | Zambia       | Lozi              | 9  |
| KJ185877   | L2c2a1  | SA      | Zambia       | Kwandi            | 9  |
| KJ185601   | L2c2a1  | SA      | Zambia       | Lozi              | 9  |
| KJ185605   | L2c2a1  | SA      | Zambia       | Lozi              | 9  |
| KJ185539   | L2c2a1  | SA      | Zambia       | Kololo            | 9  |
| KJ185983   | L2c2a1  | SA      | Zambia       | Lunda             | 9  |
| JX303792   | L2c2a1  | SA      | Zambia       | Totela            | 13 |
| KJ185604   | L2c2a1  | SA      | Zambia       | Lozi              | 9  |
| JX303863   | L2c2a1  | SA      | Zambia       | Fwe               | 13 |
| JX303750   | L2c2a1  | SA      | Zambia       | Totela            | 13 |
| HG03354    | L2c2b1  | CA      | Nigeria      | Esan              | 2  |
| JQ704094   | L2c2b1a | -       | unknown      | -                 | 8  |

**Supplementary Table 3.** (continued)

|           |             |     |              |                   |               |
|-----------|-------------|-----|--------------|-------------------|---------------|
| NA18517   | L2c2b1a     | CA  | Nigeria      | Yoruba            | 2             |
| EU092710  | L2c2b1b     | EUR | Netherlands  | Dutch             | 1             |
| KJ185834  | L2c2b1b     | SA  | Angola       | Ovimbundu         | 9             |
| KC622075  | L2c2b1b     | SA  | Botswana     | Kalanga           | 10            |
| KJ185775  | L2c2b1b     | SA  | Angola       | Nyaneka           | 9             |
| KJ185526  | L2c2b1b     | SA  | Angola       | Kuvale            | 9             |
| KJ185774  | L2c2b1b     | SA  | Angola       | Nyaneka           | 9             |
| KJ185602  | L2c2b1b     | SA  | Angola       | Lozi              | 9             |
| JQ044853  | L2c2b2      | WA  | Burkina Faso | -                 | 3             |
| JQ044917  | L2c3        | WA  | Burkina Faso | -                 | 3             |
| HG03074   | L2c3        | WA  | Sierra Leone | Mende             | 2             |
| JQ044810  | L2c3        | WA  | Burkina Faso | -                 | 3             |
| JQ044971  | L2c3        | WA  | Burkina Faso | -                 | 3             |
| JQ705626  | L2c3        | -   | unknown      | -                 | 8             |
| Howell575 | L2c3        | AM  | USA          | -                 | 4             |
| Howell572 | L2c3        | AM  | USA          | -                 | 4             |
| AF346995  | L2c3a       | -   | unknown      | Mandenka          | 12            |
| JQ045104  | L2c3a       | WA  | Mandenka     | Mandenka          | 3             |
| JQ045109  | L2c3a       | WA  | Mandenka     | Mandenka          | 3             |
| JQ702115  | L2c4        | -   | unknown      | -                 | 8             |
| HG02757   | L2c4        | WA  | Gambia       | -                 | 2             |
| HG02878   | L2c4        | WA  | Gambia       | -                 | 2             |
| HG02756   | L2c4        | WA  | Gambia       | -                 | 2             |
| JQ044914  | L2c4        | WA  | Burkina Faso | -                 | 3             |
| JQ044921  | L2c4        | WA  | Burkina Faso | -                 | 3             |
| HG02715   | L2c5        | WA  | Gambia       | -                 | 2             |
| AY195785  | L2c5        | SA  | S. Africa    | S. Africa         | 19            |
| HG02643   | L2c5        | WA  | Gambia       | -                 | 2             |
| HG02896   | L2c5        | WA  | Gambia       | -                 | 2             |
| HG02462   | L2c5        | WA  | Gambia       | -                 | 2             |
| HG02667   | L2c5        | WA  | Gambia       | -                 | 2             |
| JQ045030  | <u>L2c6</u> | WA  | Burkina Faso | -                 | 3             |
| HG03072   | <u>L2c6</u> | WA  | Sierra Leone | Mende             | 2             |
| HG02879   | <u>L2c6</u> | WA  | Gambia       | -                 | 2             |
| STP48     | <u>L2c6</u> | WA  | STP          | -                 | Present study |
| EU597570  | L2d         | AM  | unknown      | Latin America     | 6             |
| SUD86     | L2d         | EA  | Sudan        | -                 | Present study |
| HG02536   | L2d         | AM  | Barbados     | African Caribbean | 2             |
| HG02881   | L2d         | WA  | Gambia       | -                 | 2             |
| EU092817  | L2d         | NA  | Algeria      | Arab              | 1             |
| HG02799   | L2d         | WA  | Gambia       | -                 | 2             |
| HG02545   | L2d1        | AM  | Barbados     | African Caribbean | 2             |
| HG03437   | L2d1        | WA  | Sierra Leone | Mende             | 2             |
| HG03279   | L2d1        | CA  | Nigeria      | Esan              | 2             |
| JQ045050  | L2d1a       | WA  | Burkina Faso | -                 | 3             |
| HG02970   | L2d1a       | CA  | Nigeria      | Esan              | 2             |



**Supplementary Table 3.** (continued)

|            |                |         |              |          |               |
|------------|----------------|---------|--------------|----------|---------------|
| KJ185421   | L2d1a          | SA      | Zambia       | Chokwe   | 9             |
| JQ044948   | L2d1a          | WA      | Burkina Faso | -        | 3             |
| JQ045044   | L2d1a          | WA      | Burkina Faso | -        | 3             |
| EU092794   | L2d1a          | AP / NE | Yemen        | -        | 1             |
| JQ045060   | L2d1a          | WA      | Burkina Faso | -        | 3             |
| Howell160  | L2d1a          | AM      | USA          | -        | 4             |
| DQ341062   | L2d1a          | EA      | Ethiopia     | -        | 23            |
| JQ044929   | L2d1a          | WA      | Burkina Faso | -        | 3             |
| JQ045011   | L2d1a          | WA      | Burkina Faso | -        | 3             |
| JX303748   | L2d1a          | SA      | Zambia       | Totela   | 13            |
| FJ460523   | L2e1a          | NA      | Tunisia      | -        | 5             |
| HG03367    | L2e1a          | CA      | Nigeria      | Esan     | 2             |
| HG03130    | <u>L2e1a1</u>  | CA      | Nigeria      | Esan     | 2             |
| KJ185902   | <u>L2e1a1a</u> | SA      | Zambia       | Kwangwa  | 9             |
| KJ185607   | <u>L2e1a1a</u> | SA      | Zambia       | Lozi     | 9             |
| KJ185695   | <u>L2e1a1a</u> | SA      | Zambia       | Mbunda   | 9             |
| KJ185608   | <u>L2e1a1a</u> | SA      | Zambia       | Lozi     | 9             |
| KJ185606   | <u>L2e1a1a</u> | SA      | Zambia       | Lozi     | 9             |
| SUD103     | <u>L2e1b</u>   | EA      | Sudan        | -        | Present study |
| JQ044816   | <u>L2e1b</u>   | WA      | Burkina Faso | -        | 3             |
| Howell153  | <u>L2e1b</u>   | AM      | USA          | -        | 4             |
| STP12      | <u>L2e1b</u>   | WA      | STP          | -        | Present study |
| Tor64(#28) | <u>L2e2</u>    | AM      | Dominica     | -        | 16            |
| HG03209    | <u>L2e2</u>    | WA      | Sierra Leone | Mende    | 2             |
| HG03240    | <u>L2e3</u>    | WA      | Gambia       | -        | 2             |
| EU092724   | <u>L2e3</u>    | WA      | G. Bissau    | Mandinga | 1             |

## References

- Behar, D. M. *et al.* The Dawn of Human Matrilineal Diversity. *The American Journal of Human Genetics* **82**, 1130–1140 (2008).
- Abecasis, G. R. *et al.* An integrated map of genetic variation from 1,092 human genomes. *Nature* **491**, 56–65 (2012).
- Barbieri, C. *et al.* Contrasting maternal and paternal histories in the linguistic context of Burkina Faso. *Molecular Biology and Evolution* **29**, 1213–1223 (2012).
- Howell, N., Elson, J. L., Turnbull, D. M. & Herrnstadt, C. African Haplogroup L mtDNA sequences show violations of clock-like evolution. *Molecular Biology and Evolution* **21**, 1843–1854 (2004).
- Costa, M. D. *et al.* Data from complete mtDNA sequencing of Tunisian centenarians: testing haplogroup association and the “golden mean” to longevity. *Mechanisms of Ageing and Development* **130**, 222–226 (2009).
- Hartmann, A. *et al.* Validation of microarray-based resequencing of 93 worldwide mitochondrial genomes. *Human Mutation* **30**, 115–122 (2009).

7. Just, R. S., Diegoli, T. M., Saunier, J. L., Irwin, J. A. & Parsons, T. J. Complete mitochondrial genome sequences for 265 African American and U.S. "Hispanic" individuals. *Forensic Science International: Genetics* **2**, e45–e48 (2008).
8. Behar, D. M. *et al.* A "Copernican" reassessment of the human mitochondrial DNA tree from its root. *The American Journal of Human Genetics* **90**, 675–684 (2012).
9. Barbieri, C. *et al.* Migration and Interaction in a Contact Zone: mtDNA Variation among Bantu-Speakers in Southern Africa. *PloS one* **9**, e99117 (2014).
10. Barbieri, C. *et al.* Unraveling the complex maternal history of Southern African Khoisan populations. *American Journal of Physical Anthropology* **153**, 435–448 (2014).
11. Cerezo, M. *et al.* Reconstructing ancient mitochondrial DNA links between Africa and Europe. *Genome Research* **22**, 821–826 (2012).
12. Ingman, M., Kaessmann, H., Pääbo, S. & Gyllensten, U. Mitochondrial genome variation and the origin of modern humans. *Nature* **408**, 708–713 (2000).
13. Barbieri, C., Butthof, A., Bostoen, K. & Pakendorf, B. Genetic perspectives on the origin of clicks in Bantu languages from southwestern Zambia. *European Journal of Human Genetics* **21**, 430–436 (2013).
14. Batini, C. *et al.* Insights into the demographic history of African Pygmies from complete mitochondrial genomes. *Molecular Biology and Evolution* **28**, 1099–1110 (2011).
15. Pereira, L. *et al.* No Evidence for an mtDNA Role in Sperm Motility: Data from Complete Sequencing of Asthenozoospermic Males. *Molecular Biology and Evolution* **24**, 868–874 (2007).
16. Torroni, A. *et al.* Do the Four Clades of the mtDNA Haplogroup L2 Evolve at Different Rates? *The American Journal of Human Genetics* **69**, 1348–1356 (2001).
17. Malyarchuk, B. A. *et al.* Reconstructing the phylogeny of African mitochondrial DNA lineages in Slavs. *European Journal of Human Genetics* **16**, 1091–1096 (2008).
18. Kujanová, M., Pereira, L., Fernandes, V., Pereira, J. B. & Cerný, V. Near eastern neolithic genetic input in a small oasis of the Egyptian Western Desert. *American Journal of Physical Anthropology* **140**, 336–346 (2009).
19. Mishmar, D. *et al.* Natural selection shaped regional mtDNA variation in humans. *Proceedings of the National Academy of Sciences of the United States of America* **100**, 171–176 (2003).
20. Mielnik-Sikorska, M., Daca, P. & Malyarchuk, B. The History of Slavs Inferred from Complete Mitochondrial Genome Sequences. *PloS one* **8**, e54360 (2013).
21. Gómez-Carballa, A. *et al.* Evolutionary analyses of entire genomes do not support the association of mtDNA mutations with Ras/MAPK pathway syndromes. *PloS one* **6**, e18348 (2011).
22. Maca-Meyer, N., Gonzalez, A., Larruga, J., Flores, C. & Cabrera, V. Major genomic mitochondrial lineages delineate early human expansions. *BMC Genetics* **2**, 13 (2001).
23. Torroni, A., Achilli, A., Macaulay, V., Richards, M. & Bandelt, H.-J. Harvesting the fruit of the human mtDNA tree. *Trends in Genetics* **22**, 339–345 (2006).

**Supplementary Table 4. List of 303 complete L0a sequences used for phylogenetic reconstruction and phylogeography analysis.** Codes for regions: AM – America, CA – Central Africa, EA – Eastern Africa, NA – Northern Africa, NE/AP – Near East/Arabian Peninsula, SA – Southern Africa, WA – Western Africa, EUR – Europe. Abbreviations: CAR – Central African Republic, S. Africa – South Africa, STP – São Tomé and Príncipe, S. Arabia – Saudi Arabia, USA – United States of America. Additional information on ethnicity or geographical location indicated whenever provided by the authors.

| Sample   | Haplogroup | Region  | Country / Ethnic group | Additional information | Reference |
|----------|------------|---------|------------------------|------------------------|-----------|
| NA19039  | L0a+95     | EA      | Kenya                  | Luhya                  | 1         |
| JX303766 | L0a1       | SA      | Zambia                 | Shanjo                 | 2         |
| KF672808 | L0a1       | SA      | Mozambique             | -                      | 3         |
| KJ186009 | L0a1       | SA      | Angola                 | Ovimbundu              | 4         |
| KJ185432 | L0a1+16293 | SA      | Zambia                 | Luvale                 | 4         |
| EU092665 | L0a1a      | AP / NE | Israel                 | Bedouin                | 5         |
| EU092764 | L0a1a      | NA      | Egypt                  | -                      | 5         |
| KF672829 | L0a1a      | CA      | Chad                   | Kanembou               | 3         |
| EU092763 | L0a1a+200  | NA      | Egypt                  | -                      | 5         |
| EU092881 | L0a1a+200  | CA      | Chad                   | Laal                   | 5         |
| EU092892 | L0a1a+200  | CA      | Chad                   | Sara                   | 5         |
| HG03063  | L0a1a+200  | WA      | Sierra Leone           | Mende                  | 1         |
| JQ044851 | L0a1a+200  | WA      | Burkina Faso           | -                      | 6         |
| JQ044903 | L0a1a+200  | WA      | Burkina Faso           | -                      | 6         |
| JQ702428 | L0a1a+200  | EUR     | Italy                  | -                      | 7         |
| KF672821 | L0a1a+200  | EA      | Ethiopia               | -                      | 3         |
| KF672830 | L0a1a+200  | EA      | Ethiopia               | Oromo                  | 3         |
| NA19027  | L0a1a+200  | EA      | Kenya                  | Luhya                  | 1         |
| NA19042  | L0a1a+200  | EA      | Kenya                  | Luhya                  | 1         |
| NA19156  | L0a1a+200  | CA      | Nigeria                | Yoruba                 | 1         |
| NA19311  | L0a1a+200  | EA      | Kenya                  | Luhya                  | 1         |
| NA19350  | L0a1a+200  | EA      | Kenya                  | Luhya                  | 1         |
| NA19379  | L0a1a+200  | EA      | Kenya                  | Luhya                  | 1         |
| EU092714 | L0a1a1     | WA      | G. Bissau              | Beafada                | 5         |
| JQ044893 | L0a1a1     | WA      | Burkina Faso           | -                      | 6         |
| KF672836 | L0a1a1     | EA      | Sudan                  | Arab                   | 3         |
| KF672837 | L0a1a1     | EA      | Sudan                  | Nubian                 | 3         |
| AF346985 | L0a1a2     | -       | unknown                | Hausa                  | 8         |
| AY195780 | L0a1a2     | SA      | S. Africa              | -                      | 9         |
| DQ304901 | L0a1a2     | AM      | USA                    | -                      | 10        |
| DQ304902 | L0a1a2     | AM      | USA                    | -                      | 10        |
| DQ304903 | L0a1a2     | AM      | USA                    | -                      | 10        |
| DQ304904 | L0a1a2     | AM      | USA                    | -                      | 10        |
| EU092819 | L0a1a2     | NA      | Algeria                | Kabyle                 | 5         |
| HG01108  | L0a1a2     | AM      | Puerto Rico            | -                      | 1         |
| HG02971  | L0a1a2     | CA      | Nigeria                | Esan                   | 1         |
| HG02981  | L0a1a2     | CA      | Nigeria                | Esan                   | 1         |
| HG03127  | L0a1a2     | CA      | Nigeria                | Esan                   | 1         |
| HG03267  | L0a1a2     | CA      | Nigeria                | Esan                   | 1         |
| HG03268  | L0a1a2     | CA      | Nigeria                | Esan                   | 1         |

**Supplementary Table 4. (continued)**

|           |         |    |              |                |    |
|-----------|---------|----|--------------|----------------|----|
| HG03298   | L0a1a2  | CA | Nigeria      | Esan           | 1  |
| HG03517   | L0a1a2  | CA | Nigeria      | Esan           | 1  |
| JQ044838  | L0a1a2  | WA | Burkina Faso | -              | 6  |
| JQ044849  | L0a1a2  | WA | Burkina Faso | -              | 6  |
| JQ044874  | L0a1a2  | WA | Burkina Faso | -              | 6  |
| JQ044995  | L0a1a2  | WA | Burkina Faso | -              | 6  |
| JQ045004  | L0a1a2  | WA | Burkina Faso | -              | 6  |
| JQ045053  | L0a1a2  | WA | Burkina Faso | -              | 6  |
| JQ702227  | L0a1a2  | -  | unknown      | -              | 7  |
| JQ703481  | L0a1a2  | -  | unknown      | -              | 7  |
| JX303757  | L0a1a2  | SA | Zambia       | Subiya         | 2  |
| JX303869  | L0a1a2  | SA | Zambia       | Fwe            | 2  |
| JX303911  | L0a1a2  | SA | Zambia       | Tonga          | 2  |
| KF672822  | L0a1a2  | WA | STP          | -              | 3  |
| KF672826  | L0a1a2  | WA | STP          | -              | 3  |
| KJ185430  | L0a1a2  | SA | Zambia       | Luvale         | 4  |
| KJ185656  | L0a1a2  | SA | Zambia       | Mbunda         | 4  |
| KJ185754  | L0a1a2  | SA | Angola       | Nyaneka        | 4  |
| KJ185806  | L0a1a2  | SA | Angola       | Ovimbundu      | 4  |
| KJ185863  | L0a1a2  | SA | Zambia       | Tswana         | 4  |
| KJ185884  | L0a1a2  | SA | Zambia       | Kwangwa        | 4  |
| KJ185972  | L0a1a2  | SA | Zambia       | Kaonde         | 4  |
| KJ186004  | L0a1a2  | SA | Zambia       | Yeyi           | 4  |
| KJ186005  | L0a1a2  | SA | Zambia       | Yeyi           | 4  |
| NA18861   | L0a1a2  | CA | Nigeria      | Yoruba         | 1  |
| NA18876   | L0a1a2  | CA | Nigeria      | Yoruba         | 1  |
| NA18877   | L0a1a2  | CA | Nigeria      | Yoruba         | 1  |
| NA19137   | L0a1a2  | CA | Nigeria      | Yoruba         | 1  |
| NA19216   | L0a1a2  | CA | Nigeria      | Yoruba         | 1  |
| NA19430   | L0a1a2  | EA | Kenya        | Luhya          | 1  |
| NA20334   | L0a1a2  | AM | USA          | -              | 1  |
| NA20336   | L0a1a2  | AM | USA          | -              | 1  |
| NA20355   | L0a1a2  | AM | USA          | -              | 1  |
| HG03084   | L0a1a3  | WA | Sierra Leone | Mende          | 1  |
| Howell586 | L0a1a3  | AM | USA          | -              | 11 |
| JQ044943  | L0a1a3  | WA | Burkina Faso | -              | 6  |
| NA18510   | L0a1a3  | CA | Nigeria      | Yoruba         | 1  |
| EU092878  | L0a1b   | CA | Chad         | Laal           | 5  |
| EU092889  | L0a1b   | CA | Chad         | Sara           | 5  |
| Howell585 | L0a1b   | AM | USA          | -              | 11 |
| AF381988  | L0a1b1  | NA | Morocco      | -              | 12 |
| DQ304900  | L0a1b1  | AM | USA          | -              | 10 |
| JX303762  | L0a1b1  | SA | Zambia       | Fwe            | 2  |
| KJ185398  | L0a1b1  | SA | Zambia       | Bemba          | 4  |
| KJ185510  | L0a1b1  | SA | Angola       | Kuvale         | 4  |
| DQ304899  | L0a1b1a | AM | USA          | -              | 10 |
| EU935434  | L0a1b1a | NA | Egypt        | el-Hayez oasis | 13 |
| EU935437  | L0a1b1a | NA | Egypt        | el-Hayez oasis | 13 |
| EU935464  | L0a1b1a | NA | Egypt        | el-Hayez oasis | 13 |

**Supplementary Table 4. (continued)**

|           |          |    |            |                |    |
|-----------|----------|----|------------|----------------|----|
| EU935467  | L0a1b1a  | NA | Egypt      | el-Hayez oasis | 13 |
| JX303817  | L0a1b1a  | SA | Zambia     | Fwe            | 2  |
| JX303823  | L0a1b1a  | SA | Zambia     | Fwe            | 2  |
| KF672807  | L0a1b1a  | CA | Chad       | Daza           | 3  |
| KF672827  | L0a1b1a  | CA | Cameroon   | Kotoco         | 3  |
| KJ185504  | L0a1b1a  | SA | Angola     | Kuvale         | 4  |
| KJ185509  | L0a1b1a  | SA | Angola     | Kuvale         | 4  |
| KJ185753  | L0a1b1a  | SA | Angola     | Nyaneka        | 4  |
| KJ185756  | L0a1b1a  | SA | Angola     | Nyaneka        | 4  |
| KJ185757  | L0a1b1a  | SA | Angola     | Nyaneka        | 4  |
| KJ185759  | L0a1b1a  | SA | Angola     | Nyaneka        | 4  |
| NA19703   | L0a1b1a  | AM | USA        | -              | 1  |
| EU092688  | L0a1b1a1 | SA | Mozambique | Shangaan       | 5  |
| EU092858  | L0a1b1a1 | SA | S. Africa  | San            | 5  |
| EU092869  | L0a1b1a1 | SA | S. Africa  | SWB            | 5  |
| EU092871  | L0a1b1a1 | SA | S. Africa  | SEB            | 5  |
| EU092909  | L0a1b1a1 | EA | Kenya      | -              | 5  |
| Howell587 | L0a1b1a1 | AM | USA        | -              | 11 |
| JQ702326  | L0a1b1a1 | -  | unknown    | -              | 7  |
| JX303796  | L0a1b1a1 | SA | Zambia     | Kwamashi       | 2  |
| KC622063  | L0a1b1a1 | SA | Botswana   | Tswana         | 14 |
| KC622067  | L0a1b1a1 | SA | Botswana   | Tswana         | 14 |
| KC622068  | L0a1b1a1 | SA | Botswana   | Tswana         | 14 |
| KC622077  | L0a1b1a1 | SA | Botswana   | Kgalagadi      | 14 |
| KC622078  | L0a1b1a1 | SA | Botswana   | Kalanga        | 14 |
| KC622112  | L0a1b1a1 | SA | Botswana   | Kgalagadi      | 14 |
| KC622114  | L0a1b1a1 | SA | Botswana   | Kgalagadi      | 14 |
| KC622115  | L0a1b1a1 | SA | Botswana   | Kgalagadi      | 14 |
| KC622117  | L0a1b1a1 | SA | Botswana   | Kgalagadi      | 14 |
| KC622121  | L0a1b1a1 | SA | Namibia    | Owambo         | 14 |
| KF672805  | L0a1b1a1 | SA | Mozambique | -              | 3  |
| KF672806  | L0a1b1a1 | SA | Mozambique | -              | 3  |
| KJ185423  | L0a1b1a1 | SA | Zambia     | Luchazi        | 4  |
| KJ185425  | L0a1b1a1 | SA | Zambia     | Luchazi        | 4  |
| KJ185431  | L0a1b1a1 | SA | Zambia     | Luvale         | 4  |
| KJ185540  | L0a1b1a1 | SA | Zambia     | Lozi           | 4  |
| KJ185542  | L0a1b1a1 | SA | Zambia     | Lozi           | 4  |
| KJ185545  | L0a1b1a1 | SA | Zambia     | Lozi           | 4  |
| KJ185547  | L0a1b1a1 | SA | Zambia     | Lozi           | 4  |
| KJ185548  | L0a1b1a1 | SA | Zambia     | Lozi           | 4  |
| KJ185549  | L0a1b1a1 | SA | Zambia     | Lozi           | 4  |
| KJ185552  | L0a1b1a1 | SA | Zambia     | Lozi           | 4  |
| KJ185554  | L0a1b1a1 | SA | Zambia     | Lozi           | 4  |
| KJ185555  | L0a1b1a1 | SA | Zambia     | Lozi           | 4  |
| KJ185659  | L0a1b1a1 | SA | Zambia     | Mbunda         | 4  |
| KJ185660  | L0a1b1a1 | SA | Zambia     | Mbunda         | 4  |
| KJ185718  | L0a1b1a1 | SA | Zambia     | Nkoya          | 4  |
| KJ185858  | L0a1b1a1 | SA | Zambia     | Shanjo         | 4  |
| KJ185966  | L0a1b1a1 | SA | Zambia     | Yauma          | 4  |

Supplementary Table 4. (continued)

|           |          |         |           |           |    |
|-----------|----------|---------|-----------|-----------|----|
| KJ185967  | L0a1b1a1 | SA      | Zambia    | Shona     | 4  |
| KJ185977  | L0a1b1a1 | SA      | Zambia    | Lunda     | 4  |
| KJ185978  | L0a1b1a1 | SA      | Zambia    | Lunda     | 4  |
| KJ185979  | L0a1b1a1 | SA      | Zambia    | Lunda     | 4  |
| KJ185990  | L0a1b1a1 | SA      | Zambia    | -         | 4  |
| KJ186001  | L0a1b1a1 | SA      | Zambia    | Tebele    | 4  |
| NA19382   | L0a1b1a1 | EA      | Kenya     | Luhya     | 1  |
| NA19448   | L0a1b1a1 | EA      | Kenya     | Luhya     | 1  |
| NA19449   | L0a1b1a1 | EA      | Kenya     | Luhya     | 1  |
| NA19466   | L0a1b1a1 | EA      | Kenya     | Luhya     | 1  |
| DQ304897  | L0a1b2   | AM      | USA       | -         | 10 |
| DQ304898  | L0a1b2   | AM      | USA       | -         | 10 |
| EU092963  | L0a1b2   | AM      | USA       | -         | 5  |
| KJ185497  | L0a1b2   | SA      | Angola    | Kuvale    | 4  |
| KJ185502  | L0a1b2   | SA      | Angola    | Kuvale    | 4  |
| KJ185507  | L0a1b2   | SA      | Angola    | Kuvale    | 4  |
| KJ185750  | L0a1b2   | SA      | Angola    | Nyaneka   | 4  |
| KJ185758  | L0a1b2   | SA      | Angola    | Nyaneka   | 4  |
| KJ186008  | L0a1b2   | SA      | Angola    | Nyaneka   | 4  |
| EU092746  | L0a1b2a  | AP / NE | S. Arabia | -         | 5  |
| Howell560 | L0a1b2a  | AM      | USA       | -         | 11 |
| KJ185551  | L0a1b2a  | SA      | Zambia    | Lozi      | 4  |
| KJ185805  | L0a1b2a  | SA      | Angola    | Ovimbundu | 4  |
| KJ185926  | L0a1b2a  | SA      | Zambia    | Makoma    | 4  |
| EU092760  | L0a1c1   | AS      | Iran      | -         | 5  |
| EU092945  | L0a1c1   | EA      | Ethiopia  | -         | 5  |
| NA19467   | L0a1c1   | EA      | Kenya     | Luhya     | 1  |
| KF672811  | L0a1c2   | CA      | Chad      | Daza      | 3  |
| NA19440   | L0a1c2   | EA      | Kenya     | Luhya     | 1  |
| EU092670  | L0a1d    | EA      | Ethiopia  | Jew       | 5  |
| EU092801  | L0a1d    | AP / NE | Yemen     | -         | 5  |
| EU092809  | L0a1d    | AP / NE | Yemen     | -         | 5  |
| EU092810  | L0a1d    | AP / NE | Yemen     | -         | 5  |
| EU092950  | L0a1d    | EA      | Ethiopia  | -         | 5  |
| KF672812  | L0a1d    | EA      | Ethiopia  | Oromo     | 3  |
| KF672815  | L0a1d    | EA      | Kenya     | Turkana   | 3  |
| KF672820  | L0a1d    | EA      | Somalia   | -         | 3  |
| EF184602  | L0a2     | EA      | Tanzania  | -         | 15 |
| EF184604  | L0a2     | EA      | Tanzania  | -         | 15 |
| EF184606  | L0a2     | EA      | Tanzania  | -         | 15 |
| EF184607  | L0a2     | EA      | Tanzania  | -         | 15 |
| EF184608  | L0a2     | EA      | Tanzania  | -         | 15 |
| KF672810  | L0a2     | EA      | Somalia   | -         | 3  |
| HM771160  | L0a2a1   | CA      | CAR       | Pygmy     | 16 |
| HM771161  | L0a2a1   | CA      | CAR       | Pygmy     | 16 |
| KC622154  | L0a2a1a  | SA      | Namibia   | Owambo    | 14 |
| KF672831  | L0a2a1a  | CA      | Niger     | Zinder    | 3  |
| KJ185396  | L0a2a1a  | SA      | Zambia    | Bemba     | 4  |
| KJ185433  | L0a2a1a  | SA      | Zambia    | Luvale    | 4  |

**Supplementary Table 4. (continued)**

|           |          |         |            |            |    |
|-----------|----------|---------|------------|------------|----|
| KJ185722  | L0a2a1a  | SA      | Zambia     | Nkoya      | 4  |
| KJ185751  | L0a2a1a  | SA      | Angola     | Nyaneka    | 4  |
| KJ185752  | L0a2a1a  | SA      | Angola     | Nyaneka    | 4  |
| KJ185881  | L0a2a1a  | SA      | Zambia     | Kwangwa    | 4  |
| KJ185882  | L0a2a1a  | SA      | Zambia     | Kwangwa    | 4  |
| KJ185883  | L0a2a1a  | SA      | Zambia     | Kwangwa    | 4  |
| KJ185424  | L0a2a1a1 | SA      | Zambia     | Luchazi    | 4  |
| EU092868  | L0a2a1a2 | SA      | S. Africa  | SWB        | 5  |
| EU092911  | L0a2a1a2 | EA      | Kenya      | -          | 5  |
| KC622065  | L0a2a1a2 | SA      | Botswana   | Tswana     | 14 |
| KF672834  | L0a2a1a2 | WA      | STP        | -          | 3  |
| KJ185968  | L0a2a1a2 | SA      | Zambia     | Shona      | 4  |
| EU092861  | L0a2a1b  | SA      | S. Africa  | SWB        | 5  |
| JX303784  | L0a2a1b  | SA      | Zambia     | Tonga      | 2  |
| JX303830  | L0a2a1b  | SA      | Zambia     | Kwamashi   | 2  |
| KJ185397  | L0a2a1b  | SA      | Zambia     | Bemba      | 4  |
| KJ185461  | L0a2a1b  | SA      | Zambia     | Tonga      | 4  |
| KJ185462  | L0a2a1b  | SA      | Zambia     | Tonga      | 4  |
| KJ185476  | L0a2a1b  | SA      | Angola     | Ganguela   | 4  |
| KJ185480  | L0a2a1b  | SA      | Angola     | Ganguela   | 4  |
| KJ185494  | L0a2a1b  | SA      | Angola     | Kuvale     | 4  |
| KJ185495  | L0a2a1b  | SA      | Angola     | Kuvale     | 4  |
| KJ185496  | L0a2a1b  | SA      | Angola     | Kuvale     | 4  |
| KJ185498  | L0a2a1b  | SA      | Angola     | Kuvale     | 4  |
| KJ185499  | L0a2a1b  | SA      | Angola     | Kuvale     | 4  |
| KJ185500  | L0a2a1b  | SA      | Angola     | Kuvale     | 4  |
| KJ185501  | L0a2a1b  | SA      | Angola     | Kuvale     | 4  |
| KJ185503  | L0a2a1b  | SA      | Angola     | Kuvale     | 4  |
| KJ185505  | L0a2a1b  | SA      | Angola     | Kuvale     | 4  |
| KJ185506  | L0a2a1b  | SA      | Angola     | Kuvale     | 4  |
| KJ185508  | L0a2a1b  | SA      | Angola     | Kuvale     | 4  |
| KJ185543  | L0a2a1b  | SA      | Zambia     | Lozi       | 4  |
| KJ185546  | L0a2a1b  | SA      | Zambia     | Lozi       | 4  |
| KJ185557  | L0a2a1b  | SA      | Zambia     | Tonga      | 4  |
| KJ185653  | L0a2a1b  | SA      | Zambia     | Mbunda     | 4  |
| KJ185654  | L0a2a1b  | SA      | Zambia     | Mbunda     | 4  |
| KJ185717  | L0a2a1b  | SA      | Zambia     | Nkoya      | 4  |
| KJ185720  | L0a2a1b  | SA      | Zambia     | Nkoya      | 4  |
| KJ185755  | L0a2a1b  | SA      | Angola     | Nyaneka    | 4  |
| KJ185865  | L0a2a1b  | SA      | Zambia     | Kwamulonga | 4  |
| FJ157838  | L0a2a2   | AS      | India      | -          | 17 |
| FJ157839  | L0a2a2   | AS      | India      | -          | 17 |
| FJ157840  | L0a2a2   | AS      | India      | -          | 17 |
| DQ341058  | L0a2a2a  | AM      | Dominica   | -          | 18 |
| EU092701  | L0a2a2a  | SA      | Mozambique | Shangaan   | 5  |
| EU092745  | L0a2a2a  | AP / NE | S. Arabia  | -          | 5  |
| EU092787  | L0a2a2a  | AP / NE | Oman       | -          | 5  |
| EU092925  | L0a2a2a  | AP / NE | Oman       | -          | 5  |
| Howell149 | L0a2a2a  | AM      | USA        | -          | 11 |

**Supplementary Table 4. (continued)**

|          |          |    |            |             |    |
|----------|----------|----|------------|-------------|----|
| JQ705109 | L0a2a2a  | -  | unknown    | -           | 7  |
| JX303763 | L0a2a2a  | SA | Zambia     | Totela      | 2  |
| JX303772 | L0a2a2a  | SA | Zambia     | Totela      | 2  |
| JX303778 | L0a2a2a  | SA | Zambia     | Totela      | 2  |
| JX303786 | L0a2a2a  | SA | Zambia     | Tonga       | 2  |
| JX303826 | L0a2a2a  | SA | Zambia     | Kwamashi    | 2  |
| JX303904 | L0a2a2a  | SA | Zambia     | Totela      | 2  |
| KC622056 | L0a2a2a  | SA | Botswana   | Tswana      | 14 |
| KC622064 | L0a2a2a  | SA | Botswana   | Tswana      | 14 |
| KC622187 | L0a2a2a  | SA | Namibia    | Kwanyama    | 14 |
| KF672819 | L0a2a2a  | SA | Mozambique | -           | 3  |
| KF672824 | L0a2a2a  | WA | STP        | -           | 3  |
| KF672825 | L0a2a2a  | EA | Somalia    | -           | 3  |
| KF672832 | L0a2a2a  | SA | Mozambique | -           | 3  |
| KF672835 | L0a2a2a  | EA | Somalia    | -           | 3  |
| KJ185394 | L0a2a2a  | SA | Zambia     | Aushi       | 4  |
| KJ185458 | L0a2a2a  | SA | Zambia     | Tokaleya    | 4  |
| KJ185477 | L0a2a2a  | SA | Angola     | Ganguela    | 4  |
| KJ185478 | L0a2a2a  | SA | Angola     | Ganguela    | 4  |
| KJ185479 | L0a2a2a  | SA | Angola     | Ganguela    | 4  |
| KJ185544 | L0a2a2a  | SA | Zambia     | Lozi        | 4  |
| KJ185556 | L0a2a2a  | SA | Zambia     | Lozi        | 4  |
| KJ185657 | L0a2a2a  | SA | Zambia     | Mbunda      | 4  |
| KJ185658 | L0a2a2a  | SA | Zambia     | Mbunda      | 4  |
| KJ185721 | L0a2a2a  | SA | Zambia     | Nkoya       | 4  |
| KJ185749 | L0a2a2a  | SA | Angola     | Nyaneka     | 4  |
| KJ185802 | L0a2a2a  | SA | Angola     | Ovimbundu   | 4  |
| KJ185804 | L0a2a2a  | SA | Angola     | Ovimbundu   | 4  |
| KJ185862 | L0a2a2a  | SA | Zambia     | Tswana      | 4  |
| KJ185970 | L0a2a2a  | SA | Zambia     | Chewa       | 4  |
| NA19312  | L0a2a2a  | EA | Kenya      | Luhya       | 1  |
| NA19328  | L0a2a2a  | EA | Kenya      | Luhya       | 1  |
| NA19402  | L0a2a2a  | EA | Kenya      | Luhya       | 1  |
| NA19904  | L0a2a2a  | AM | USA        | -           | 1  |
| JX303831 | L0a2a2a1 | SA | Zambia     | Kwamashi    | 2  |
| JX303835 | L0a2a2a1 | SA | Zambia     | Kwamashi    | 2  |
| KJ185541 | L0a2a2a1 | SA | Zambia     | Lozi        | 4  |
| KJ185550 | L0a2a2a1 | SA | Zambia     | Lozi        | 4  |
| KJ185553 | L0a2a2a1 | SA | Zambia     | Lozi        | 4  |
| KJ185655 | L0a2a2a1 | SA | Zambia     | Mbunda      | 4  |
| KJ185719 | L0a2a2a1 | SA | Zambia     | Nkoya       | 4  |
| KJ185803 | L0a2a2a1 | SA | Angola     | Ovimbundu   | 4  |
| KJ185946 | L0a2a2a1 | SA | Zambia     | Nyengo      | 4  |
| KJ185947 | L0a2a2a1 | SA | Zambia     | Nyengo      | 4  |
| NA19713  | L0a2a2a1 | AM | USA        | -           | 1  |
| NA19985  | L0a2a2a1 | AM | USA        | -           | 1  |
| AF346998 | L0a2b    | CA | Congo      | Mbuti Pygmy | 8  |
| AF346999 | L0a2b    | CA | Congo      | Mbuti Pygmy | 8  |
| AM711903 | L0a2b    | CA | Congo      | Pygmy       | 19 |



**Supplementary Table 4.** (continued)

|          |        |    |          |         |    |
|----------|--------|----|----------|---------|----|
| EU597537 | L0a2b  | CA | Congo    | Pygmy   | 20 |
| HM771189 | L0a2b  | CA | Congo    | Pygmy   | 16 |
| HM771190 | L0a2b  | CA | Congo    | Pygmy   | 16 |
| HM771199 | L0a2b  | CA | Congo    | Pygmy   | 16 |
| HM771202 | L0a2b  | CA | Congo    | Pygmy   | 16 |
| HM771188 | L0a2b1 | CA | Congo    | Pygmy   | 16 |
| HM771200 | L0a2b1 | CA | Congo    | Pygmy   | 16 |
| HM771201 | L0a2b1 | CA | Congo    | Pygmy   | 16 |
| EF556174 | L0a2c  | EA | Ethiopia | Jew     | 21 |
| KF672813 | L0a2c  | EA | Somalia  | -       | 3  |
| EU092913 | L0a2d  | EA | Kenya    | -       | 5  |
| KJ185399 | L0a2d  | SA | Zambia   | Bemba   | 4  |
| KJ185463 | L0a2d  | SA | Zambia   | Tonga   | 4  |
| EU092900 | L0a3   | CA | Chad     | Sara    | 5  |
| KF672796 | L0a3   | CA | Cameroon | Bulahay | 3  |
| EU092906 | L0a4   | EA | Kenya    | -       | 5  |

## References

1. Abecasis, G. R. *et al.* An integrated map of genetic variation from 1,092 human genomes. *Nature* **491**, 56–65 (2012).
2. Barbieri, C., Butthof, A., Bostoen, K. & Pakendorf, B. Genetic perspectives on the origin of clicks in Bantu languages from southwestern Zambia. *European Journal of Human Genetics* **21**, 430–436 (2013).
3. Rito, T. *et al.* The first modern human dispersals across Africa. *PloS one* **8**, e80031 (2013).
4. Barbieri, C. *et al.* Migration and Interaction in a Contact Zone: mtDNA Variation among Bantu-Speakers in Southern Africa. *PloS one* **9**, e99117 (2014).
5. Behar, D. M. *et al.* The Dawn of Human Matrilineal Diversity. *The American Journal of Human Genetics* **82**, 1130–1140 (2008).
6. Barbieri, C. *et al.* Contrasting maternal and paternal histories in the linguistic context of Burkina Faso. *Molecular Biology and Evolution* **29**, 1213–1223 (2012).
7. Behar, D. M. *et al.* A “Copernican” reassessment of the human mitochondrial DNA tree from its root. *The American Journal of Human Genetics* **90**, 675–684 (2012).
8. Ingman, M., Kaessmann, H., Pääbo, S. & Gyllensten, U. Mitochondrial genome variation and the origin of modern humans. *Nature* **408**, 708–713 (2000).
9. Mishmar, D. *et al.* Natural selection shaped regional mtDNA variation in humans. *Proceedings of the National Academy of Sciences of the United States of America* **100**, 171–176 (2003).
10. Just, R. S., Diegoli, T. M., Saunier, J. L., Irwin, J. A. & Parsons, T. J. Complete mitochondrial genome sequences for 265 African American and U.S. “Hispanic” individuals. *Forensic Science International: Genetics* **2**, e45–e48 (2008).
11. Howell, N., Elson, J. L., Turnbull, D. M. & Herrnstadt, C. African Haplogroup L mtDNA sequences show violations of clock-like evolution. *Molecular Biology and Evolution* **21**, 1843–1854 (2004).

12. Maca-Meyer, N., Gonzalez, A., Larruga, J., Flores, C. & Cabrera, V. Major genomic mitochondrial lineages delineate early human expansions. *BMC Genetics* **2**, 13 (2001).
13. Kujanová, M., Pereira, L., Fernandes, V., Pereira, J. B. & Cerný, V. Near eastern neolithic genetic input in a small oasis of the Egyptian Western Desert. *American Journal of Physical Anthropology* **140**, 336–346 (2009).
14. Barbieri, C. *et al.* Unraveling the complex maternal history of Southern African Khoisan populations. *American Journal of Physical Anthropology* **153**, 435–448 (2014).
15. Gonder, M. K., Mortensen, H. M., Reed, F. a, de Sousa, A. & Tishkoff, S. a. Whole-mtDNA genome sequence analysis of ancient African lineages. *Molecular Biology and Evolution* **24**, 757–768 (2007).
16. Batini, C. *et al.* Insights into the demographic history of African Pygmies from complete mitochondrial genomes. *Molecular Biology and Evolution* **28**, 1099–1110 (2011).
17. Eaaswarkhanth, M. *et al.* Traces of sub-Saharan and Middle Eastern lineages in Indian Muslim populations. *European Journal of Human Genetics : EJHG* **18**, 354–363 (2010).
18. Torroni, A., Achilli, A., Macaulay, V., Richards, M. & Bandelt, H.-J. Harvesting the fruit of the human mtDNA tree. *Trends in Genetics* **22**, 339–345 (2006).
19. Arnason, U., Gullberg, A., Janke, A. & Kullberg, M. Mitogenomic analyses of caniform relationships. *Molecular Phylogenetics and Evolution* **45**, 863–874 (2007).
20. Hartmann, A. *et al.* Validation of microarray-based resequencing of 93 worldwide mitochondrial genomes. *Human Mutation* **30**, 115–122 (2009).
21. Behar, D. M. *et al.* Counting the founders: the matrilineal genetic ancestry of the Jewish Diaspora. *PLoS one* **3**, e2062 (2008).

**Supplementary Table 5. GPS coordinates in WGS-84 (World Geodetic System, 1984) of capital cities used as reference points to construct L2 frequency distribution and references for the 12880 HVS-I sequences used to assess L2 frequency.** Codes for regions: CA – Central Africa, EA – Eastern Africa, NA – Northern Africa, SA – Southern Africa, WA – Western Africa. Abbreviations: BF – Burkina Faso, CV – Cape Verde, Eq. Guinea – Equatorial Guinea, STP – São Tomé and Príncipe, S. Leone – Sierra Leone, W. Sahara – Western Sahara.

| Region | Country      | Capital      | GPS Coordinates (WGS 84)  | References |
|--------|--------------|--------------|---------------------------|------------|
| WA     | BF           | Ouagadougou  | 12°21'26" N 1°32'07" W    | 1-3        |
|        | CV           | Praia        | 14°55'15" N 23° 30'30" W  | 4          |
|        | Gambia       | Banjul       | 13°27'11" N 16°34'39" W   | 5          |
|        | Ghana        | Accra        | 5°33'00" N 0°12'00" W     | 6          |
|        | Mali         | Bamako       | 12°39'00" N 8°00'00" W    | 1,3,7,8    |
|        | STP          | São Tomé     | 0°20'10" N 6°40'53" E     | 9,10       |
|        | Senegal      | Dakar        | 14°41'34" N 17°26'48" W   | 2,11,12    |
|        | S.Leone      | Freetown     | 8°29'4" N 13°14'04" W     | 5,13       |
| CA     | Cameroon     | Yaoundé      | 3°52'00" N 11°31'00" E    | 3,6,14     |
|        | Chad         | N'Djamena    | 12°06'47" N 15°02'57" E   | 3,11       |
|        | Congo        | Brazzaville  | 4°16'04" S 15°17'31" E    | 11         |
|        | Eq. Guinea   | Malabo       | 3°45'00" N 8°46'59" E     | 9          |
|        | Niger        | Niamey       | 13°31'17" N 02°06'19" E   | 1,3,11     |
|        | Nigeria      | Abuja        | 9°04'00" N 7°29'00" E     | 3,5,6,11   |
|        | W. Sahara    | El Aaiún     | 27°09'13" N 13°12'12" W   | 12,15      |
| EA     | Ethiopia     | Addis Ababa  | 9°01'48" N 38°44'24" E    | 16-19      |
|        | Kenya        | Nairobi      | 1°17'31" S 36°49'19" E    | 5,11,20,21 |
|        | Rwanda       | Kigali       | 1°56'38" S 30°03'34" E    | 22         |
|        | Somalia      | Mogadishu    | 02°02' N 45°21' E         | 11,19      |
|        | Sudan        | Khartoum     | 15°32'47" N 32°32'00" E   | 19,23      |
|        | Tanzania     | Dodoma       | 06° 10'23" S 35° 44'31" E | 24         |
| SA     | Angola       | Luanda       | 8°50'18" S 13°14'04" E    | 25-27      |
|        | Botswana     | Gaborone     | 24°39'29" S 25°54'44" E   | 28         |
|        | Cabinda      | Cabinda      | 5°33'36" S 12°11'24" E    | 29         |
|        | Madagascar   | Antananarivo | 18°54'51" S 47°31'51" E   | 30         |
|        | Mozambique   | Maputo       | 25°57'55" S 32°35'21" E   | 31,32      |
|        | Namibia      | Windhoek     | 22°34'12" S 17°05'01" E   | 28         |
|        | South Africa | Pretoria     | 25°44'46" S 28°11'17" E   | 33,34      |
|        | Zambia       | Lusaka       | 15°24'29" S 28°17'10" E   | 35,36      |
|        | Zimbabwe     | Harare       | 17°51'50" S 31°01'47" E   | 22         |
| NA     | Algeria      | Algiers      | 36°45'08" N 3°02'31" E    | 15         |
|        | Egypt        | Cairo        | 30°03'29" N 31°13'44" E   | 37,38      |
|        | Libya        | Tripoli      | 32°54'08" N 13°11'09" E   | 39         |
|        | Mauritania   | Nouakchott   | 18°06'01" N 15°56'59" W   | 8,12       |
|        | Morocco      | Rabat        | 34°00'47" N 6°49'57" W    | 12,37,40   |
|        | Tunisia      | Tunis        | 36°49'08" N 10°09'56" E   | 15,41-44   |

## References

1. Pereira, L. *et al.* Linking the sub-Saharan and West Eurasian gene pools: maternal and paternal heritage of the Tuareg nomads from the African Sahel. *European Journal of Human Genetics* **18**, 915–923 (2010).
2. Barbieri, C. *et al.* Contrasting maternal and paternal histories in the linguistic context of Burkina Faso. *Molecular Biology and Evolution* **29**, 1213–1223 (2012).
3. Černý, V. *et al.* Genetic Structure of Pastoral and Farmer Populations in the African Sahel. *Molecular Biology and Evolution* **28**, 2491–2500 (2011).
4. Brehm, A., Pereira, L., Bandelt, H. J., Prata, M. J. & Amorim, A. Mitochondrial portrait of the Cabo Verde archipelago: the Senegambian outpost of Atlantic slave trade. *Annals of Human Genetics* **66**, 49–60 (2002).
5. Abecasis, G. R. *et al.* An integrated map of genetic variation from 1,092 human genomes. *Nature* **491**, 56–65 (2012).
6. Veeramah, K. R. *et al.* Little genetic differentiation as assessed by uniparental markers in the presence of substantial language variation in peoples of the Cross River region of Nigeria. *BMC Evolutionary Biology* **10**, 92 (2010).
7. Ely, B., Wilson, J. L., Jackson, F. & Jackson, B. A. African-American mitochondrial DNAs often match mtDNAs found in multiple African ethnic groups. *BMC Biology* **4**, 34 (2006).
8. González, A. M. *et al.* Mitochondrial DNA variation in Mauritania and Mali and their genetic relationship to other Western Africa populations. *Annals of Human Genetics* **70**, 631–657 (2006).
9. Mateu, E. *et al.* A tale of two islands: population history and mitochondrial DNA sequence variation of Bioko and São Tomé, Gulf of Guinea. *Annals of Human Genetics* **61**, 507–518 (1997).
10. Trovada, M. J. *et al.* Pattern of mtDNA Variation in Three Populations from Sao Tome e Principe. *Annals of Human Genetics* **68**, 40–54 (2004).
11. Watson, E., Forster, P., Richards, M. & Bandelt, H. Mitochondrial footprints of human expansions in Africa. *The American Journal of Human Genetics* 691–704 (1997).
12. Rando, J. C. *et al.* Mitochondrial DNA analysis of Northwest African populations reveals genetic exchanges with European, Near-Eastern, and sub-Saharan populations. *Annals of Human Genetics* **62**, 531–550 (1998).
13. Jackson, B. A. *et al.* Mitochondrial DNA genetic diversity among four ethnic groups in Sierra Leone. *American Journal of Physical Anthropology* **128**, 156–163 (2005).
14. Quintana-Murci, L. *et al.* Maternal traces of deep common ancestry and asymmetric gene flow between Pygmy hunter-gatherers and Bantu-speaking farmers. *Proceedings of the National Academy of Sciences of the United States of America* **105**, 1596–1601 (2008).
15. Plaza, S. *et al.* Joining the Pillars of Hercules: mtDNA Sequences Show Multidirectional Gene Flow in the Western Mediterranean. *Annals of Human Genetics* **67**, 312–328 (2003).
16. Poloni, E. S. *et al.* Genetic evidence for complexity in ethnic differentiation and history in East Africa. *Annals of human genetics* **73**, 582–600 (2009).

17. Kivisild, T. *et al.* Ethiopian Mitochondrial DNA Heritage: Tracking Gene Flow Across and Around the Gate of Tears. *The American Journal of Human Genetics* **75**, 752–770 (2004).
18. Non, A. L., Al-Meerri, A., Raaum, R. L., Sanchez, L. F. & Mulligan, C. J. Mitochondrial DNA reveals distinct evolutionary histories for Jewish populations in Yemen and Ethiopia. *American Journal of Physical Anthropology* **144**, 1–10 (2011).
19. Soares, P. *et al.* The Expansion of mtDNA Haplogroup L3 within and out of Africa. *Molecular Biology and Evolution* **29**, 915–927 (2012).
20. Brandstätter, A. *et al.* Mitochondrial DNA control region sequences from Nairobi (Kenya): inferring phylogenetic parameters for the establishment of a forensic database. *International Journal of Legal Medicine* **118**, 294–306 (2004).
21. Boattini, A. *et al.* mtDNA variation in East Africa unravels the history of Afro-Asiatic groups. *American Journal of Physical Anthropology* **150**, 375–385 (2013).
22. Castri, L. *et al.* mtDNA variability in two Bantu-speaking populations (Shona and Hutu) from Eastern Africa: implications for peopling and migration patterns in sub-Saharan Africa. *American Journal of Physical Anthropology* **140**, 302–311 (2009).
23. Krings, M. *et al.* mtDNA Analysis of Nile River Valley Populations: A Genetic Corridor or a Barrier to Migration? *The American Journal of Human Genetics* **64**, 1166–1176 (1999).
24. Knight, A., Underhill, P. & Mortensen, H. African Y chromosome and mtDNA divergence provides insight into the history of click languages. *Current Biology* **13**, 464–473 (2003).
25. Coelho, M., Sequeira, F., Luiselli, D., Beleza, S. & Rocha, J. On the edge of Bantu expansions: mtDNA, Y chromosome and lactase persistence genetic variation in southwestern Angola. *BMC Evolutionary Biology* **9**, 80 (2009).
26. Plaza, S. *et al.* Insights into the western Bantu dispersal: mtDNA lineage analysis in Angola. *Human Genetics* **115**, 439–447 (2004).
27. Barbieri, C. *et al.* Migration and Interaction in a Contact Zone: mtDNA Variation among Bantu-Speakers in Southern Africa. *PloS one* **9**, e99117 (2014).
28. Barbieri, C. *et al.* Unraveling the complex maternal history of Southern African Khoisan populations. *American Journal of Physical Anthropology* **153**, 435–448 (2014).
29. Beleza, S., Gusmão, L., Amorim, A., Carracedo, A. & Salas, A. The genetic legacy of western Bantu migrations. *Human Genetics* **117**, 366–375 (2005).
30. Tofanelli, S. *et al.* On the origins and admixture of Malagasy: new evidence from high-resolution analyses of paternal and maternal lineages. *Molecular Biology and Evolution* **26**, 2109–2124 (2009).
31. Salas, A. *et al.* The making of the African mtDNA landscape. *The American Journal of Human Genetics* **71**, 1082–1111 (2002).
32. Pereira, L. *et al.* Prehistoric and historic traces in the mtDNA of Mozambique : insights into the Bantu expansions and the slave trade. *Annals of Human Genetics* **65**, 439–458 (2001).

33. Quintana-Murci, L. *et al.* Strong maternal Khoisan contribution to the South African coloured population: a case of gender-biased admixture. *The American Journal of Human Genetics* **86**, 611–620 (2010).
34. Chen, Y. S. *et al.* mtDNA variation in the South African Kung and Khwe-and their genetic relationships to other African populations. *The American Journal of Human Genetics* **66**, 1362–1383 (2000).
35. De Filippo, C., Heyn, P., Barham, L., Stoneking, M. & Pakendorf, B. Genetic perspectives on forager-farmer interaction in the Luangwa valley of Zambia. *American Journal of Physical Anthropology* **141**, 382–394 (2010).
36. Barbieri, C., Butthof, A., Bostoen, K. & Pakendorf, B. Genetic perspectives on the origin of clicks in Bantu languages from southwestern Zambia. *European Journal of Human Genetics* **21**, 430–436 (2013).
37. Coudray, C. *et al.* The complex and diversified mitochondrial gene pool of Berber populations. *Annals of Human Genetics* **73**, 196–214 (2009).
38. Saunier, J. L. *et al.* Mitochondrial control region sequences from an Egyptian population sample. *Forensic Science International: Genetics* **3**, e97–e103 (2009).
39. Ottoni, C. *et al.* First genetic insight into Libyan Tuaregs: a maternal perspective. *Annals of Human Genetics* **73**, 438–448 (2009).
40. Rhouda, T. *et al.* Moroccan mitochondrial genetic background suggests prehistoric human migrations across the Gibraltar Strait. *Mitochondrion* **9**, 402–407 (2009).
41. Fadhlou-Zid, K. *et al.* Mitochondrial DNA heterogeneity in Tunisian Berbers. *Annals of Human Genetics* **68**, 222–233 (2004).
42. Loueslati, B. Y. *et al.* Islands inside an island: reproductive isolates on Jerba island. *American journal of human biology : the official journal of the Human Biology Council* **18**, 149–153 (2006).
43. Turchi, C. *et al.* Polymorphisms of mtDNA control region in Tunisian and Moroccan populations: an enrichment of forensic mtDNA databases with Northern Africa data. *Forensic Science International: Genetics* **3**, 166–172 (2009).
44. Cherni, L. *et al.* Post-Last Glacial Maximum Expansion From Iberia to North Africa Revealed by Fine Characterization of mtDNA H Haplogroup in Tunisia. *American Journal of Physical Anthropology* **139**, 253–260 (2009).

**Supplementary Table 6. Information on the populations used to assess pairwise genetic distances and to compute the MDS plots. References for the 4880 HVS-I sequences used.** Codes for regions: CA – Central Africa, EA – Eastern Africa, SA – Southern Africa, WA – Western Africa. Abbreviations: Eq. Guinea – Equatorial Guinea, STP – São Tomé and Príncipe.

| Region       | Country      | Population         | Code  | N       | Language group               | Additional information   | Reference |
|--------------|--------------|--------------------|-------|---------|------------------------------|--------------------------|-----------|
| EA           | Ethiopia     | Daasanach          | Daa   | 49      | Cushitic                     | Agropastoralist          | 1         |
|              |              | Dawro-Konta        | Daw   | 137     | Omotiic                      | Agropastoralist          | 2         |
|              |              | Nyangatom          | Nya   | 112     | Nilotic                      | Agropastoralist          | 1         |
|              |              | General population | Eth   | 77      | -                            | -                        | 3         |
|              | Kenya        | El Molo            | Elm   | 52      | Cushitic                     | Fishing                  | 2         |
|              |              | Luo                | Luo   | 49      | Nilotic                      | Agropastoralist, fishing | 2         |
|              |              | Luhya              | LWK   | 120     | Bantu                        | Agriculturalist          | 4         |
|              |              | Maasai             | Maa   | 81      | Nilotic                      | Seminomadic pastoralist  | 2         |
|              |              | Turkana            | Turk  | 37      | Nilotic                      | Seminomadic pastoralist  | 5         |
|              | Rwanda       | Hutu               | Hutu  | 42      | Bantu                        | -                        | 6         |
|              | Somalia      | General population | Som   | 177     | -                            | -                        | 3,5       |
|              | Sudan        | General population | Sud   | 178     | -                            | -                        | 3,7       |
|              | Tanzania     | Burunge            | Buru  | 38      | Cushitic                     | Agriculturalist          | 8         |
| Datog        |              | Dat                | 31    | Nilotic | Pastoralist, Agriculturalist | 8                        |           |
| WA           | Burkina Faso | Various groups     | BF    | 291     | -                            | -                        | 9         |
|              | Cape Verde   | General population | CV    | 295     | -                            | -                        | 10        |
|              | Gambia       | Western Division   | GWD   | 113     | -                            | -                        | 4         |
|              | Mali         | Bambara            | Mali  | 158     | Mande                        | -                        | 11,12     |
|              |              | Malinke            | Mali  | 158     | Mande                        | -                        |           |
|              | Senegal      | Mandenka           | Man   | 131     | Mande                        | -                        | 5,9       |
| Wolof        |              | Wol                | 61    | Wolof   | -                            | 13,14                    |           |
| Sierra Leone | Mende        | MSL                | 85    | Mel     | -                            | 4                        |           |
| CA           | Eq. Guinea   | Bioko              | Bio   | 45      | Bantu                        | -                        | 15        |
|              | Cameroon     | Ngumba             | Ngu   | 88      | Bantu                        | -                        | 16        |
|              | Gabon        | Akele              | Ake   | 48      | Bantu                        | -                        | 16        |
|              |              | Ateke              | Ate   | 54      | Bantu                        | -                        |           |
|              |              | Benga              | Beng  | 50      | Bantu                        | -                        |           |
|              |              | Duma               | Duma  | 47      | Bantu                        | -                        |           |
|              |              | Eshira             | Eshi  | 40      | Bantu                        | -                        |           |
|              |              | Eviya              | Evi   | 38      | Bantu                        | -                        |           |
|              |              | Fang               | Fang  | 66      | Bantu                        | -                        |           |
|              |              | Galoa              | Gal   | 51      | Bantu                        | -                        |           |
|              |              | Kota               | Kota  | 56      | Bantu                        | -                        |           |
|              |              | Makina             | Mak   | 45      | Bantu                        | -                        |           |
| Mitsogo      | Mits         | 64                 | Bantu | -       |                              |                          |           |

**Table S6.** (continued)

|    |         |                    |                    |       |          |                             |                 |       |
|----|---------|--------------------|--------------------|-------|----------|-----------------------------|-----------------|-------|
|    |         | Nzebi              | Nze                | 63    | Bantu    | -                           |                 |       |
|    |         | Punu               | Punu               | 52    | Bantu    | -                           |                 |       |
|    |         | Shake              | Sha                | 51    | Bantu    | -                           |                 |       |
|    | Nigeria | Esan               | ESN                | 99    | Edoid    | -                           | 4               |       |
|    |         | Yoruba             | Yor                | 193   | Yoruboid | -                           | 4,5,9           |       |
|    | STP     | General population | STP                | 54    | -        | -                           | 15              |       |
| SA |         | Mbundu             |                    |       | Bantu    | -                           | 17              |       |
|    |         | West-Savanna       | Ang                | 466   | Bantu    | -                           | 18              |       |
|    |         | Cabinda (Fiote)    | Cab                | 109   | Bantu    | -                           | 19              |       |
|    |         | Kuvale             | Kuv                | 55    | Bantu    | Seminomadic<br>pastoralists | 20              |       |
|    |         | Nyaneka            | Nyane              | 59    | Bantu    | Agriculturalist             | 20              |       |
|    |         | Mozambique         | General population | Moz   | 187      | -                           | -               | 21,22 |
|    |         |                    | Bisa               | Bisa  | 42       | Bantu                       | -               | 23    |
|    |         |                    | Fwe                | Fwe   | 33       | Bantu                       | Agropastoralist | 24    |
|    |         |                    | Kunda              | Kunda | 36       | Bantu                       | -               | 23    |
|    |         |                    | Kwamashi           | Kwam  | 35       | Bantu                       | Agriculturalist | 20    |
|    |         | Zambia             | Kwangwa            | Kwang | 35       | Bantu                       | -               | 20    |
|    |         |                    | Lozi               | Lozi  | 110      | Bantu                       | Agriculturalist | 20    |
|    |         |                    | Mbunda             | Mbun  | 64       | Bantu                       | Agriculturalist | 20    |
|    |         |                    | Nkoya              | Nkoy  | 32       | Bantu                       | Agriculturalist | 20    |
|    |         |                    | Tonga              | Ton   | 37       | Bantu                       | Agriculturalist | 24    |
|    |         | Zimbabwe           | Shona              | Sho   | 62       | Bantu                       | -               | 6     |

## References

1. Poloni, E. S. *et al.* Genetic evidence for complexity in ethnic differentiation and history in East Africa. *Annals of Human Genetics* **73**, 582–600 (2009).
2. Boattini, A. *et al.* mtDNA variation in East Africa unravels the history of Afro-Asiatic groups. *American Journal of Physical Anthropology* **150**, 375–385 (2013).
3. Soares, P. *et al.* The Expansion of mtDNA Haplogroup L3 within and out of Africa. *Molecular Biology and Evolution* **29**, 915–927 (2012).
4. Abecasis, G. R. *et al.* An integrated map of genetic variation from 1,092 human genomes. *Nature* **491**, 56–65 (2012).
5. Watson, E., Forster, P., Richards, M. & Bandelt, H. Mitochondrial footprints of human expansions in Africa. *The American Journal of Human Genetics* 691–704 (1997).
6. Castri, L. *et al.* mtDNA variability in two Bantu-speaking populations (Shona and Hutu) from Eastern Africa: implications for peopling and migration patterns in sub-Saharan Africa. *American Journal of Physical Anthropology* **140**, 302–311 (2009).



7. Krings, M. *et al.* mtDNA Analysis of Nile River Valley Populations: A Genetic Corridor or a Barrier to Migration? *The American Journal of Human Genetics* **64**, 1166–1176 (1999).
8. Tishkoff, S. a *et al.* History of click-speaking populations of Africa inferred from mtDNA and Y chromosome genetic variation. *Molecular Biology and Evolution* **24**, 2180–2195 (2007).
9. Barbieri, C. *et al.* Contrasting maternal and paternal histories in the linguistic context of Burkina Faso. *Molecular Biology and Evolution* **29**, 1213–1223 (2012).
10. Brehm, A., Pereira, L., Bandelt, H. J., Prata, M. J. & Amorim, A. Mitochondrial portrait of the Cabo Verde archipelago: the Senegambian outpost of Atlantic slave trade. *Annals of Human Genetics* **66**, 49–60 (2002).
11. Ely, B., Wilson, J. L., Jackson, F. & Jackson, B. A. African-American mitochondrial DNAs often match mtDNAs found in multiple African ethnic groups. *BMC Biology* **4**, 34 (2006).
12. González, A. M. *et al.* Mitochondrial DNA variation in Mauritania and Mali and their genetic relationship to other Western Africa populations. *Annals of Human Genetics* **70**, 631–657 (2006).
13. Rando, J. C. *et al.* Mitochondrial DNA analysis of Northwest African populations reveals genetic exchanges with European, Near-Eastern, and sub-Saharan populations. *Annals of Human Genetics* **62**, 531–550 (1998).
14. Stefflova, K. *et al.* Evaluation of group genetic ancestry of populations from Philadelphia and Dakar in the context of sex-biased admixture in the Americas. *PloS one* **4**, e7842 (2009).
15. Mateu, E. *et al.* A tale of two islands: population history and mitochondrial DNA sequence variation of Bioko and São Tomé, Gulf of Guinea. *Annals of Human Genetics* **61**, 507–518 (1997).
16. Quintana-Murci, L. *et al.* Maternal traces of deep common ancestry and asymmetric gene flow between Pygmy hunter-gatherers and Bantu-speaking farmers. *Proceedings of the National Academy of Sciences of the United States of America* **105**, 1596–1601 (2008).
17. Plaza, S. *et al.* Insights into the western Bantu dispersal: mtDNA lineage analysis in Angola. *Human Genetics* **115**, 439–447 (2004).
18. Coelho, M., Sequeira, F., Luiselli, D., Beleza, S. & Rocha, J. On the edge of Bantu expansions: mtDNA, Y chromosome and lactase persistence genetic variation in southwestern Angola. *BMC Evolutionary Biology* **9**, 80 (2009).
19. Beleza, S., Gusmão, L., Amorim, A., Carracedo, A. & Salas, A. The genetic legacy of western Bantu migrations. *Human Genetics* **117**, 366–375 (2005).
20. Barbieri, C. *et al.* Unraveling the complex maternal history of Southern African Khoisan populations. *American Journal of Physical Anthropology* **153**, 435–448 (2014).
21. Salas, A. *et al.* The making of the African mtDNA landscape. *The American Journal of Human Genetics* **71**, 1082–1111 (2002).
22. Pereira, L. *et al.* Prehistoric and historic traces in the mtDNA of Mozambique: insights into the Bantu expansions and the slave trade. *Annals of Human Genetics* **65**, 439–458 (2001).

23. De Filippo, C., Heyn, P., Barham, L., Stoneking, M. & Pakendorf, B. Genetic perspectives on forager-farmer interaction in the Luangwa valley of Zambia. *American Journal of Physical Anthropology* **141**, 382–394 (2010).
24. Barbieri, C., Butthof, A., Bostoen, K. & Pakendorf, B. Genetic perspectives on the origin of clicks in Bantu languages from southwestern Zambia. *European Journal of Human Genetics* **21**, 430–436 (2013).

**Supplementary Table 7. Haplogroup frequencies and sample size (N) by region and by country/group.** Codes for regions: CA – Central Africa, EA – Eastern Africa, SA – Southern Africa, WA – Western Africa. Abbreviations: DRC – Democratic Republic of Congo, Eq. Guinea – Equatorial Guinea, STP – São Tomé and Príncipe.

| Region<br>Country/Group | N           | Haplogroup frequency |              |              |              |              |              |              |              |              |              |              |              |              |              |              |              |              |
|-------------------------|-------------|----------------------|--------------|--------------|--------------|--------------|--------------|--------------|--------------|--------------|--------------|--------------|--------------|--------------|--------------|--------------|--------------|--------------|
|                         |             | L0a                  | L0d          | L0k          | L0*          | L1b          | L1c          | L2a          | L2*          | L3b          | L3d          | L3e          | L3f          | L3*          | L4           | L5           | L*           | M'N(R)       |
| <b>WA</b>               | <b>1941</b> | <b>0.014</b>         | <b>0.000</b> | <b>0.000</b> | <b>0.000</b> | <b>0.128</b> | <b>0.041</b> | <b>0.232</b> | <b>0.173</b> | <b>0.117</b> | <b>0.064</b> | <b>0.099</b> | <b>0.026</b> | <b>0.012</b> | <b>0.004</b> | <b>0.000</b> | <b>0.000</b> | <b>0.089</b> |
| Burkina Faso            | 427         | 0.023                | 0.000        | 0.000        | 0.000        | 0.126        | 0.019        | 0.272        | 0.155        | 0.122        | 0.056        | 0.077        | 0.019        | 0.009        | 0.012        | 0.000        | 0.000        | 0.110        |
| Cape Verde              | 292         | 0.007                | 0.000        | 0.000        | 0.000        | 0.079        | 0.068        | 0.205        | 0.209        | 0.106        | 0.072        | 0.147        | 0.007        | 0.007        | 0.000        | 0.000        | 0.000        | 0.092        |
| Gambia                  | 113         | 0.000                | 0.000        | 0.000        | 0.000        | 0.115        | 0.018        | 0.159        | 0.265        | 0.115        | 0.124        | 0.088        | 0.000        | 0.044        | 0.018        | 0.000        | 0.000        | 0.053        |
| Ghana                   | 239         | 0.008                | 0.000        | 0.000        | 0.000        | 0.096        | 0.075        | 0.310        | 0.088        | 0.063        | 0.050        | 0.197        | 0.054        | 0.000        | 0.000        | 0.000        | 0.000        | 0.059        |
| Mali                    | 305         | 0.010                | 0.000        | 0.000        | 0.000        | 0.151        | 0.030        | 0.207        | 0.187        | 0.138        | 0.059        | 0.095        | 0.030        | 0.000        | 0.000        | 0.000        | 0.000        | 0.095        |
| Senegal                 | 293         | 0.007                | 0.000        | 0.000        | 0.000        | 0.171        | 0.020        | 0.218        | 0.167        | 0.147        | 0.038        | 0.034        | 0.017        | 0.034        | 0.000        | 0.000        | 0.000        | 0.147        |
| Sierra Leone            | 272         | 0.033                | 0.000        | 0.000        | 0.000        | 0.147        | 0.059        | 0.202        | 0.191        | 0.118        | 0.092        | 0.077        | 0.048        | 0.011        | 0.000        | 0.000        | 0.000        | 0.022        |
| <b>CA</b>               | <b>4043</b> | <b>0.064</b>         | <b>0.000</b> | <b>0.000</b> | <b>0.000</b> | <b>0.079</b> | <b>0.245</b> | <b>0.146</b> | <b>0.071</b> | <b>0.065</b> | <b>0.043</b> | <b>0.165</b> | <b>0.062</b> | <b>0.017</b> | <b>0.004</b> | <b>0.002</b> | <b>0.000</b> | <b>0.038</b> |
| Cameroon                | 859         | 0.081                | 0.000        | 0.000        | 0.000        | 0.045        | 0.332        | 0.108        | 0.035        | 0.061        | 0.049        | 0.162        | 0.066        | 0.013        | 0.003        | 0.000        | 0.000        | 0.044        |
| Chad                    | 138         | 0.022                | 0.000        | 0.000        | 0.000        | 0.225        | 0.014        | 0.167        | 0.109        | 0.203        | 0.043        | 0.080        | 0.036        | 0.036        | 0.014        | 0.007        | 0.000        | 0.043        |
| DRC                     | 39          | 0.256                | 0.000        | 0.000        | 0.000        | 0.000        | 0.000        | 0.641        | 0.000        | 0.000        | 0.000        | 0.000        | 0.000        | 0.000        | 0.000        | 0.103        | 0.000        | 0.000        |
| Eq. Guinea              | 45          | 0.089                | 0.000        | 0.000        | 0.000        | 0.000        | 0.267        | 0.200        | 0.044        | 0.000        | 0.000        | 0.244        | 0.000        | 0.000        | 0.000        | 0.000        | 0.000        | 0.156        |
| Gabon                   | 946         | 0.080                | 0.000        | 0.000        | 0.000        | 0.054        | 0.424        | 0.125        | 0.050        | 0.020        | 0.037        | 0.145        | 0.050        | 0.011        | 0.005        | 0.000        | 0.000        | 0.000        |
| Niger                   | 233         | 0.021                | 0.000        | 0.000        | 0.000        | 0.185        | 0.013        | 0.116        | 0.150        | 0.240        | 0.069        | 0.069        | 0.034        | 0.017        | 0.009        | 0.000        | 0.000        | 0.077        |
| Nigeria                 | 1554        | 0.046                | 0.000        | 0.000        | 0.001        | 0.086        | 0.128        | 0.168        | 0.093        | 0.066        | 0.042        | 0.205        | 0.085        | 0.024        | 0.003        | 0.000        | 0.000        | 0.053        |
| Pygmy groups            | 121         | 0.074                | 0.000        | 0.000        | 0.000        | 0.017        | 0.554        | 0.182        | 0.008        | 0.000        | 0.025        | 0.107        | 0.000        | 0.000        | 0.008        | 0.025        | 0.000        | 0.000        |
| STP                     | 108         | 0.074                | 0.000        | 0.000        | 0.000        | 0.167        | 0.194        | 0.111        | 0.102        | 0.046        | 0.056        | 0.204        | 0.028        | 0.019        | 0.000        | 0.000        | 0.000        | 0.000        |
| <b>EA</b>               | <b>1994</b> | <b>0.123</b>         | <b>0.005</b> | <b>0.000</b> | <b>0.052</b> | <b>0.008</b> | <b>0.007</b> | <b>0.124</b> | <b>0.029</b> | <b>0.024</b> | <b>0.018</b> | <b>0.030</b> | <b>0.040</b> | <b>0.132</b> | <b>0.118</b> | <b>0.033</b> | <b>0.012</b> | <b>0.246</b> |
| Ethiopia                | 648         | 0.085                | 0.000        | 0.000        | 0.025        | 0.014        | 0.002        | 0.110        | 0.026        | 0.008        | 0.022        | 0.008        | 0.037        | 0.130        | 0.094        | 0.068        | 0.028        | 0.346        |
| Kenya                   | 570         | 0.170                | 0.005        | 0.000        | 0.091        | 0.005        | 0.005        | 0.098        | 0.018        | 0.037        | 0.011        | 0.051        | 0.053        | 0.168        | 0.035        | 0.023        | 0.000        | 0.230        |
| Rwanda                  | 42          | 0.167                | 0.000        | 0.000        | 0.167        | 0.000        | 0.024        | 0.071        | 0.048        | 0.167        | 0.024        | 0.071        | 0.000        | 0.143        | 0.071        | 0.048        | 0.000        | 0.000        |

**Supplementary Table 7.** (continued)

|              |             |              |              |              |              |              |              |              |              |              |              |              |              |              |              |              |              |              |
|--------------|-------------|--------------|--------------|--------------|--------------|--------------|--------------|--------------|--------------|--------------|--------------|--------------|--------------|--------------|--------------|--------------|--------------|--------------|
| Somalia      | 178         | 0.062        | 0.006        | 0.000        | 0.017        | 0.017        | 0.011        | 0.135        | 0.112        | 0.011        | 0.039        | 0.028        | 0.034        | 0.225        | 0.039        | 0.006        | 0.017        | 0.242        |
| Sudan        | 178         | 0.051        | 0.000        | 0.000        | 0.000        | 0.006        | 0.011        | 0.298        | 0.045        | 0.017        | 0.011        | 0.006        | 0.096        | 0.096        | 0.045        | 0.028        | 0.000        | 0.292        |
| Tanzania     | 378         | 0.177        | 0.016        | 0.000        | 0.066        | 0.000        | 0.013        | 0.106        | 0.003        | 0.024        | 0.016        | 0.042        | 0.005        | 0.056        | 0.360        | 0.003        | 0.008        | 0.106        |
| <b>SA</b>    | <b>2746</b> | <b>0.117</b> | <b>0.207</b> | <b>0.013</b> | <b>0.002</b> | <b>0.024</b> | <b>0.115</b> | <b>0.139</b> | <b>0.039</b> | <b>0.022</b> | <b>0.062</b> | <b>0.144</b> | <b>0.041</b> | <b>0.005</b> | <b>0.005</b> | <b>0.006</b> | <b>0.000</b> | <b>0.059</b> |
| Angola       | 709         | 0.171        | 0.062        | 0.004        | 0.000        | 0.041        | 0.193        | 0.103        | 0.071        | 0.025        | 0.051        | 0.172        | 0.068        | 0.007        | 0.000        | 0.000        | 0.000        | 0.032        |
| Botswana     | 96          | 0.177        | 0.000        | 0.000        | 0.000        | 0.021        | 0.042        | 0.240        | 0.021        | 0.010        | 0.104        | 0.208        | 0.052        | 0.000        | 0.052        | 0.063        | 0.000        | 0.010        |
| Cabinda      | 110         | 0.127        | 0.000        | 0.000        | 0.000        | 0.027        | 0.245        | 0.045        | 0.082        | 0.036        | 0.055        | 0.218        | 0.127        | 0.009        | 0.000        | 0.000        | 0.000        | 0.027        |
| Mozambique   | 338         | 0.074        | 0.062        | 0.000        | 0.000        | 0.015        | 0.062        | 0.405        | 0.036        | 0.036        | 0.068        | 0.180        | 0.030        | 0.000        | 0.000        | 0.006        | 0.003        | 0.024        |
| Namibia      | 262         | 0.034        | 0.424        | 0.111        | 0.000        | 0.011        | 0.031        | 0.015        | 0.008        | 0.000        | 0.206        | 0.080        | 0.073        | 0.004        | 0.004        | 0.000        | 0.000        | 0.000        |
| South Africa | 631         | 0.046        | 0.597        | 0.000        | 0.000        | 0.006        | 0.010        | 0.046        | 0.008        | 0.010        | 0.025        | 0.032        | 0.005        | 0.010        | 0.008        | 0.003        | 0.000        | 0.195        |
| Zambia       | 541         | 0.165        | 0.026        | 0.006        | 0.011        | 0.031        | 0.198        | 0.185        | 0.048        | 0.030        | 0.039        | 0.214        | 0.024        | 0.000        | 0.006        | 0.013        | 0.000        | 0.006        |
| Zimbabwe     | 59          | 0.271        | 0.017        | 0.017        | 0.000        | 0.034        | 0.085        | 0.203        | 0.034        | 0.068        | 0.068        | 0.186        | 0.000        | 0.000        | 0.017        | 0.000        | 0.000        | 0.000        |
